# Supplementary material
Source: PubMed Central journal article supplement (PMC6817638)
Supplement: mmc2.pdf [file mmc2.pdf]

# Mechanical Point Loading Induces Cortex Stiffening and Actin Reorganization

Jinrong Hu,<sup>1,2</sup> Shenbao Chen,<sup>1,2</sup> Wenhui Hu,<sup>1,3</sup> Shouqin Lü,<sup>1,2,\*</sup> and Mian Long<sup>1,2,\*</sup>

<sup>1</sup>Center of Biomechanics and Bioengineering, Key Laboratory of Microgravity (National Microgravity Laboratory), Beijing Key Laboratory of Engineered Construction and Mechanobiology, and CAS Center for Excellence in Complex System Mechanics, Institute of Mechanics, Chinese Academy of Sciences, Beijing, China; <sup>2</sup>School of Engineering Science, University of Chinese Academy of Sciences, Beijing, China; and <sup>3</sup>Immune Cells and Antibody Engineering Research Center of Guizhou Province, Key Laboratory of Biology and Medical Engineering, Guizhou Medical University, Guiyang, China

**ABSTRACT** Global cytoskeleton reorganization is well-recognized when cells are exposed to distinct mechanical stimuli, but the localized responses at a specified region of a cell are still unclear. In this work, we mapped the cell-surface mechanical property of single cells in situ before and after static point loading these cells using atomic force microscopy in PeakForce-Quantitative Nano Mechanics mode. Cell-surface stiffness was elevated at a maximum of 1.35-fold at the vicinity of loading site, indicating an enhanced structural protection of the cortex to the cell. Mechanical modeling also elucidated the structural protection from the stiffened cell cortex, in which 9–15% and 10–19% decrease of maximum stress and strain of the nucleus were obtained. Furthermore, the flat-ended atomic force microscopy probes were used to capture cytoskeleton reorganization after point loading quantitatively, revealing that the larger the applied force and the longer the loading time are, the more pronounced cytoskeleton reorganization is. Also, point loading using a microneedle combined with real-time confocal microscopy uncovered the fast dynamics of actin cytoskeleton reorganization for actin-stained live cells after point loading (<10 s). These results furthered the understandings in the transmission of localized mechanical forces into an adherent cell.

**SIGNIFICANCE** Mechanical reorganization of cellular components is crucial in biological homeostasis when a cell is exposed to the complicated mechanical environment in vivo. In contrast to global loading on an entire cell or cellular monolayer, point loadings usually induce confined cellular responses around the loading site. In a combination of experimental measurements and mechanical modeling, this study indicated that cell-surface stiffness was elevated around the loading site upon point loading with fast dynamics of cytoskeletal reorganization in <10 s, and this mechanical enhancement acted as structural protection of the cell cortex to intracellular components with reduced nucleus stress and strain. This work anticipated physical protection of single cells under point loading and furthered the understanding of localized force transmission inside a cell.

## INTRODUCTION

Cells always situate in different mechanical milieus (1–13) and have different responses to distinct physical or mechanical microenvironments. As the main structural elements for cells to resist physical perturbations (14–17), the cytoskeleton is crucial for sensing and responding to different mechanical microenvironments. How the cytoskeleton responds to diverse mechanical stimuli has attracted much attention (7,16,18,19). For instance, strong and polarized actin stress fibers are formed in osteoblastic cells even at a

very short duration of shear flow (20), and similar shear-enhanced stress fiber structure and actin reorganization can also be observed in endothelial cells (21). Other mechanical stimuli show different impacts on cytoskeleton dynamics, as exemplified by the fact that cyclic stretching osteoblasts and fibroblasts can induce actin stress fibers reorienting to the direction perpendicular to the stretch to favor the stress release along the stretch direction (9).

Cytoskeleton responses under different mechanical loading are coupled with mechanical property changes of the cells. Under shear stress of 1–8 Pa for several hours, actin filaments are reorganized and aligned along the flow direction in osteoblastic and endothelial cells, followed by cell-stiffness enhancement (20,22). Cell stiffness also increases or decreases when cells are placed in hypertonic

Submitted April 29, 2019, and accepted for publication September 10, 2019.

\*Correspondence: lsq@imech.ac.cn or mlong@imech.ac.cn

Editor: Philip LeDuc.

<https://doi.org/10.1016/j.bpj.2019.09.012>

© 2019 Biophysical Society.

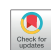

or hypotonic solution and present varied surface tension (23,24). Cell-stiffness enhancement is also detected for cells in dynamic stretch using magnetic tweezers (25,26), and these mechanical changes vary with different loading modes (loading rate, duration, and amplitude) of substrate strain in distinct cell types (27–29). Interestingly, cyclic stretch helps the formation and strengthening of actin cap in mouse embryonic fibroblasts, which binds to nuclear lamina to maintain normal nuclear morphology and to reduce the stress applied on the nucleus (16). Evidently, cytoskeleton stiffening induced by mechanical loading also plays consequential roles in protecting cell components.

Although existing works mainly focus on cellular responses and mechanical changes upon specific loadings, most of them are bulk studies, and average effects from the cell population are analyzed. Thus, in situ change of mechanical properties upon cytoskeleton reorganization in a single cell remains unclear under mechanical loading. Although cell stiffness was compared before and after loading a cell using a force of 5–20 nN for 10 min (30), the related results only focused on a single point measurement without characterizing the whole cell. Meanwhile, cytoskeleton responses to mechanical loadings of varied extent (e.g., loading force magnitude and duration) have not been anatomized quantitatively, and the real-time dynamics of cytoskeleton reorganization to distinct mechanical loadings still remains to be unveiled. In this work, we aim to take in situ mechanical properties mappings of single cells before and after mechanical point loading and further explore the contribution of cytoskeleton structure to cell mechanical properties and the cytoskeletal reorganization dynamics upon mechanical point loading.

## MATERIALS AND METHODS

Multiple methods of mechanical loading were applied together with varied cell imaging protocols and then summarized for clarity. In brief, two kinds of mechanical point loading on the surfaces of single cells were performed by atomic force microscopy (AFM) tip and glass microneedle, respectively. The former was used for quantitative point loading with preset force and duration, together with offline confocal laser scanning microscopy of cellular actin and nucleus. The latter was used along with in situ confocal microscopy to record the real-time dynamics of actin cytoskeleton reorganization under controllable mechanical loading. The changes of cell-surface mechanical property of single cells were evaluated before and after the point loading of AFM measurements. In addition, mechanical modeling and numerical simulations were also performed for unveiling the roles of cytoskeletons in cell responses.

### Cell culture

Three types of cells were used in this study. Human cervical carcinoma cell line HeLa cells were obtained from Dr. Feng Shao, and human foreskin fibroblast line HF and human umbilical vascular endothelial cell line HUVEC were both purchased from ATCC (American Type Culture Collection, Manassas, VA). HeLa cells and HFs were cultured in RPMI and DMEM(L) Medium (HyClone, Logan, UT) supplemented with 10% fetal bovine serum (Gibco, Thermo Fisher Scientific, Shanghai, China) and

100 U/mL penicillin-streptomycin (HyClone, Chicago, IL), respectively. Both kinds of cells were plated on poly-L-lysine-coated glass bottom dishes (Cellvis, Mountain View, CA) overnight for use. HeLa cells were used when they reached >80% confluence except for low-density experiments. In that case, cells were seeded in 1/8 density of normal seeding to isolate each cell. HFs were used when reaching around 50% confluence (mostly isolated cells). HUVECs were cultured in Medium 199 supplemented with 20% fetal bovine serum, 100 U/mL penicillin, 20 mM HEPES (HyClone, Logan, UT), 3 g/mL thymidine (Sigma-Aldrich, Shanghai, China), 1 mM L-glutamine (Sigma-Aldrich), 14 U/mL heparin sodium (Sigma-Aldrich), 25 g/mL amphotericin B (Amresco, Solon, OH), and 5 ng/mL bFGF (R&D Systems, Minneapolis, MN). They were plated on collagen I (Sigma-Aldrich)-coated glass-bottomed dishes to form a monolayer before using.

### AFM experiments

AFM tests were performed on Bioscope Catalyst (Bruker, Billerica, MA) with an inverted fluorescence microscope IX71 (Olympus, Shinjuku, Tokyo, Japan) for point loading the top of the cell and mapping the cell-surface mechanical property. For point loading experiments, in-house-customized flat-ended CSG-10 probes, a general gift from Dr. Bin Tang (Fig. S1 A; nominal spring constant 0.07 N/m, tip diameter 1.5–2  $\mu\text{m}$ ), were used for applying a constant force of 2.5, 5, or 10 nN with different duration of 1 or 3 min upon the settings of ramp displacement 6  $\mu\text{m}$  and ramp velocity 1  $\mu\text{m/s}$  (ramp rate  $\ll 1$ ). Deflection sensitivity and spring constant of each AFM probe were calibrated through sapphire indentation and thermal tune method before loading, respectively. Cells were treated with 1:500 diluted Hoechst 33342 in culture medium (Thermo Fisher Scientific) for labeling nucleus for 10 min and followed by three times washing using prewarmed DPBS (HyClone, Logan, UT) before mechanical loading. In some cases, cells were first treated with 15  $\mu\text{M}$  blebbistatin (Bleb) (Sigma-Aldrich) or 15  $\mu\text{M}$  cytochalasin D (Cyto D) (TOCRIS, Bristol, UK or Cayman, Ann Arbor, MI) for 20 min, respectively, or with 100 nM trichostatin A (TSA) (Sigma-Aldrich) for 24 h, and then the nucleus was stained (all the drugs were diluted using culture medium). After point loading, the cells were fixed using 4% paraformaldehyde at room temperature for 15 min and then stained with respective fluorescent probes before the offline confocal microscopy observations.

For mechanical property mapping experiments, Bruker patent PeakForce-Quantitative Nano Mechanics (PF-QNM) mode was performed using precalibrated (spring constant around 0.07 N/m) PF-QNM-LC probes with 17- $\mu\text{m}$  tip height and 65-nm tip radius. Parameter settings included peak force frequency 0.5 kHz, setpoint 1 nN (with deformation around 400 nm), and amplitude 300 nm. The resolution of imaging was  $256 \times 128$  with a scanning size of  $15 \times 15 \mu\text{m}$ , which took  $\sim 5$  min to finish one round of scanning. To detect cell-surface mechanical property changes induced by point loading, the tip was ramped onto the cell surface for 3-min delay and 5-nN loading after the first 5-min scanning, and the same region was then scanned again. Finally, Sneddon model was used for extracting Young's modulus  $E$  in the PF-QNM measurements.

### Microneedle experiments

Microneedle manipulation combined with in situ confocal fluorescence microscopy was used to monitor point-loading-induced actin reorganization dynamics. Closed-end microneedles with radii around 1.5  $\mu\text{m}$  were made from thin-wall glass capillaries (WPI, Sarasota, FL) using a Narishige PN-31 Micropipette-Puller (Narishige, Tokyo, Japan). A micropipette manipulation unit (Narishige) was used to manipulate loading on cells (Fig. S1 B). Microneedle loading was depicted using dashed downward arrow (Fig. S1 C), and the real-time actin reorganization was observed under point loading. Here, the microneedle approach serves as the qualitative supplement for AFM point loading. No quantitative indentation force

values were obtained, mainly because of the difficulty of in situ spring constant calibration.

## Immunofluorescence staining and imaging

For those fixed cells after AFM point loading, 1:40 rhodamine phalloidin (Thermo Fisher Scientific) diluted by 1% bovine serum albumin (BSA) (Sigma-Aldrich) was used to stain F-actin for 30 min at 37°C. In some cases, after treating with 5% BSA at 37°C for 1 h to block nonspecific epitopes, 1:200  $\gamma$ H2AX antibody (Abcam, Shanghai, China) diluted by 1% BSA was used to label DNA damage for 1 h at 37°C. Then the cells were rinsed three times using phosphate-buffered saline, and actin was stained as described above with another three times phosphate-buffered saline rinsing. Confocal laser scanning microscopy (Zeiss LSM 710; Zeiss, Oberkochen, Germany) with a 63 $\times$ /1.35 NA oil-immersed objective was used for the imaging of stained cells in three modes as follows: three-dimensional (3D) reconstruction only (“3DR”) was performed with stack interval of 0.3  $\mu$ m and pinhole in 1 AU; time series only (“TS”) was carried on with an interval of 2 s, maximum pinhole, and 30 frames in total; combination of 3D reconstruction with time series (“3DR” + “TS”) was taken with a stack interval of 1.5–1.6  $\mu$ m, pinhole in 2–3 AU, 7–13 slices per cell,  $\sim$ 0.77 s per slice, 10 s per Z-stack, and six frames in total.

## Live-cell staining and transfection

SiR-Actin Spirochrome Kit (Cytoskeleton, Denver, CO) was used in 0.5  $\mu$ M and 6-h incubation to stain F-actin for both HeLa cells and HUVECs, and the stained cells were rinsed three times using DPBS and replenished in culture medium before using. Verapamil was used in 10  $\mu$ M and incubated for 6 h to favor actin staining as manufacturer’s instructions. Transfection on HeLa cells with Lifeact-RFP plasmid (a gift from Dr. Zhu Zeng) was performed using Lipofectamine 3000 Transfection Kit (Invitrogen, Shanghai, China). Cells were used after incubating 24–36 h.

## FRAP

Fluorescence recovery after photobleaching (FRAP) was performed to confirm the fast actin recovery dynamics in a cell upon microneedle point loading. Imaging was performed with pinhole as 3  $\mu$ m, bleaching iteration as 20, and pixel dwell time as 50.42  $\mu$ s. Photobleaching started right after microneedle loading on the focal plane. First, a 2.5- $\mu$ m-diameter circle centered on the loading site was set as the region to be bleached. Meanwhile, a  $\sim$ 3- $\mu$ m-diameter circle in the absence of cells was set as background (BG) and a  $\sim$ 5- $\mu$ m-diameter circle that located on another cell far from the bleached one as reference (REF) for fluorescence intensity normalization. The fluorescence normalization was done by  $I_{norm} = [(I_{REF}^0 - I_{BG}^0)(I_{bleached} - I_{BG})] / [(I_{bleached}^0 - I_{BG}^0)(I_{REF} - I_{BG})]$ , in which the superscript “0” denoted the initial fluorescence intensity right before bleaching. Then the data were fitted using  $I_{norm} = (1 - a)(1 - be^{-k_{off} \times t})$ , in which  $a$  and  $b$  denoted the fractions of immobile and bound actin, respectively, and  $k_{off}$  the unbinding rate constant of actin (31). Half-time, as the index defining actin recovery dynamics, was calculated as  $\tau_{1/2} = \ln 2 / k_{off}$ .

## Mechanical simulation

To unveil the roles of actin cytoskeleton (mainly cell cortex in this work) in cell responses, mechanical simulations were performed using Abaqus 6.14-2 (Dassault, France). The simulations were set as axisymmetric, and CAX3H/CAX4H elements were adopted. The geometry of the model was described in Fig. S1 D as “Cytoplasm” representing cell cortex with

thickness  $\delta_c = 1 \mu$ m and the nucleus  $\delta_n = 8 \mu$ m (15). No slip was allowed on the interface between cell cortex and the nucleus. The indenter was set as analytical rigid (infinite stiffness), and the cell was set as neo-Hookean hyperelastic material and deformable. The stiffness of cytoplasm was set as  $E_c = 1, 3, \text{ or } 5 \text{ kPa}$ , and the nucleus was 1.5-fold stiffer than cytoplasm with  $E_n = 1.5, 4.5, \text{ or } 7.5 \text{ kPa}$  (32,33) for parametric analysis, respectively. The Poisson’s ratio of cytoplasm (cell cortex) and the nucleus were both set as 0.36 (34).

Simulations were performed with even surface stiffness distribution. We first used a sharp-ended probe with tip radius of 100 nm to test the feasibility of the simulations and found that the finite element method was unable to rule out mesh-size dependence or high-strain-induced divergence when the indentation depth was beyond 300 nm (Fig. S2, A and B), as reported in (35,36). Reduction of indentation depth or increase of tip radius is the common strategy to avoid mesh-size dependence and high-strain-induced divergence (35,36). In our model, the tip radius was enlarged to 500 nm, and much denser mesh sizes up to 50 nm were applied near the loading site upon exerting the constant force (but not the constant indentation depth) of 5 nN (for all the cases except the one mentioned below) as in PF-QNM experiments (Fig. S2, C and D), even though the tip radius of the PF-QNM-LC probe was around 65 nm. It should be noted that the loading force was set around 2 nN in the condition of  $E_c = 1 \text{ kPa}$ , with  $E_n = 1.5 \text{ kPa}$  to ensure convergence. The simulations on the flat-ended probe were performed as the same as those of the above sharp-ended tips but with a different probe geometry.

Abaqus/Standard was used to run the general static simulations. The bottom of the cell was set as fixed to avoid rigid body motion. Displacement control was used to load the indenter and typical results from specified loading force (e.g., 5 nN) were extracted for analyses. Mesh sensitivity was tested before running the simulations.

## Data analysis

Fluorescence images were analyzed using Imaris 7.4.2 (Bitplane, Belfast, UK) and ImageJ (National Institutes of Health, Bethesda, MD). Data fitting was done by MATLAB (The MathWorks, Natick, MA), and AFM QNM data were analyzed using NanoScope Analysis 1.4 and 1.8.

To quantify the extent of actin fluorescence reorganization after point loading upon microneedle or AFM probe, the cell was segregated into upper and lower regions using the red line (Fig. S1 C), and only those fluorescent intensities above the red line were collected to exclude the potential interference from the basal stress fibers in the lower region. The extent of the local actin intensity enhancement was assessed by the ratio of mean actin fluorescence intensity around the loading site  $I_{RO}$ /mean actin fluorescence above the whole nucleus  $I_N$  (to exclude the interference from peripheral strong stress fibers) as  $I_{Relative} = I_{RO}/I_N$  (details in Fig. S1, E–G). Note that all fluorescence data were shown in Z-projections except of those from “TS” mode only or for FRAP test.

To quantify cell-surface stiffness, 10 circular rings surrounding the center of loading point were segregated ( $R_1$ – $R_{10}$ ,  $R_1$  was a circle) with  $\Delta R = 0.75 \mu$ m for calculating the distributions of Young’s modulus  $E$  from PF-QNM mapping. The center of loading point was chosen based on contrasting topography and 3D height images before and after loading (the loading sites were always near the center of those images because the probe approximately shifts near the center of imaging regions when ramping). The  $E$ -value of each point was extracted ( $n = 260$ –4600 for each ring), and mean  $E$  for each ring was calculated. Self-written customized MATLAB codes were used for ring partition, raw data extraction, and modulus calculation.

All the statistics were run using GraphPad Prism 6 (San Diego, CA). One/two-way ANOVA analysis was performed with Dunnett’s or Tukey’s test ( $\geq 3$  groups) or two-tailed  $t$ -test (two groups) to reveal difference between the different groups.

## RESULTS

## Cell-surface stiffness increases after point loading

Because the cytoskeleton is one of the most important structural elements for cells to resist physical cues (14,16,17), it is reasonably anticipated that mechanical alteration of the cytoskeleton at the loaded region is required to reinforce cellular resistance to applied forces. To investigate the cell-surface mechanical alterations upon local point loading, a PF-QNM mode with PF-QNM-LC probes (37–39) was used to map surface topography, geometry, and Young's modulus in a  $15 \times 15 \mu\text{m}$  region around the loading site, and all the loading sites were above the nucleus to rule out the potential interference from the substrate (Fig. 1).

Here, tens of thousands of force curves were obtained from one scanning and one curve for each pixel. The region was selected and scanned first (Fig. 1 A; *L Ctl*, loading control), and then point loading was applied near the region center in 5 nN/3 min (loaded for 3 min with force 5 nN). The same region was scanned again just after loading without pause (Fig. 1 B). Negative control without point loading was performed with two successive scanings in the same region (Fig. 1, C and D; *NL Ctl*, nonloading control). Typical surface topography, 3D height, and Young's modulus  $E$  in scanned cells were presented in the first, second, and third columns of Fig. 1, respectively. The Young's modulus  $E$  at the same scanning region was determined twice and thus denoted as  $E_1$  and  $E_2$  for the first and second scanings. The center of point loading was determined by

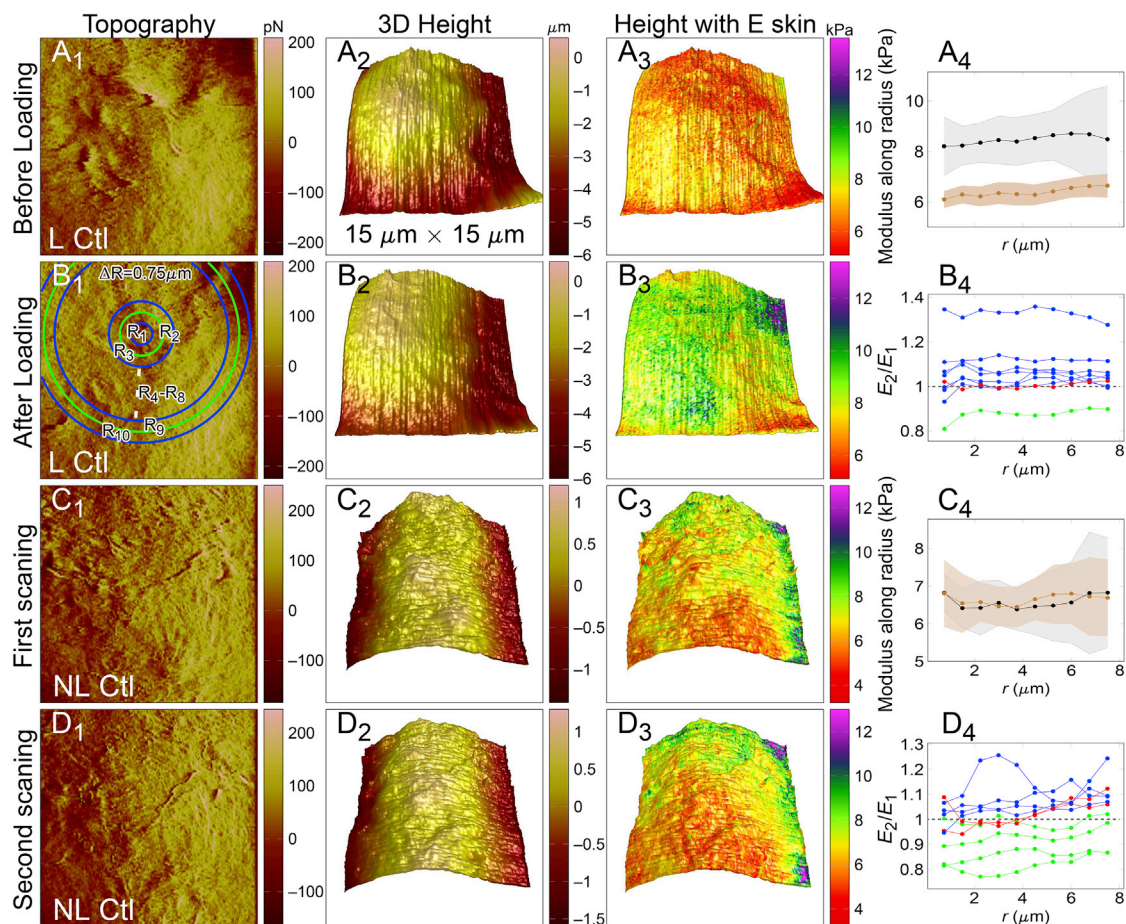

FIGURE 1 Comparisons of topography, 3D structure, and elasticity of HeLa cells before and after point loading. (A and B) AFM scanning within a  $15 \times 15 \mu\text{m}$  region was first performed on the top of the nucleus, and AFM tip was then point loaded near the center of the region at 5 nN for 3 min (shortly, 5 nN/3 min) (A). After loading, the scanning at the same region was performed again (B). (C and D) The first AFM scanning was performed from the top of the nucleus, and then the second scan followed at the same region with no pause. The first three columns showed typical topography of the scanned region, 3D height mapping, and Young's modulus  $E$  mapped to 3D height images, respectively. (A<sub>4</sub>) and (C<sub>4</sub>) in the fourth column show representative  $E$  distributions before (brown) and after (black) the 3-min point loading (A<sub>4</sub>) or two sequential scanings (C<sub>4</sub>). The rule of extracting and computing  $E$  was interpreted in (B<sub>1</sub>), and more details can be seen in [Data Analysis](#), in which  $E \pm \text{SD}$  for each ring ( $n = 260\text{--}4600$  from  $R_1$  to  $R_{10}$ ) was plotted. (B<sub>4</sub>) and (D<sub>4</sub>) in the fourth column depict the ratio of  $E$  before (named  $E_1$ )/after (named  $E_2$ ) point loading (B<sub>4</sub>) or two sequential scanings (D<sub>4</sub>). Here, each line represented the data of one cell with  $E_2/E_1 > 1$  in blue,  $\sim 1$  in red, and  $< 1$  in green.  $E_2/E_1 = 1$  in horizontal dashed lines was used for reference. All data were from two to three repeats. *L Ctl*, loading control; *NL Ctl*, nonloading control. To see this figure in color, go online.

checking the changes in topography and 3D height images before and after loading, as indicated by the center of rings in Fig. 1  $B_1$ . The ring center was set as the center of image in the cases of *NL Ctl* group. Representative mean  $E \pm$  SD of scanned cells for each ring were plotted in Fig. 1,  $A_4$  and  $C_4$ , and the ratios of  $E$  ( $= E_2/E_1$ ) of all the cells for each ring were presented in Fig. 1,  $B_4$  and  $D_4$  for respective loading and nonloading cases. The results exhibited that cell-surface stiffness increases after point loading with  $E_2/E_1 > 1$  (blue) for seven of nine cells,  $E_2/E_1 \approx 1$  (red) or  $< 1$  (green) for only one cell (Fig. 1  $B_4$ ). In nonloading group, both  $E_2/E_1 > 1$  and  $< 1$  for 4 of 10 cells and  $E_2/E_1 \approx 1$  for two cells (Fig. 1  $D_4$ ). Quantitative statistics also revealed a significant cortex stiffening after point loading (Fig. S3).

It has been known that cell-surface stiffness is dominated by cortex stiffness (40,41), and no apical stress fiber is seen in some cancer cells (37). Because actomyosin contractility has been proved to help maintain cortex mechanical strength (15) and actin network integrity plays an important role in cellular responses to different mechanical loadings (42–44), it is interesting to test whether cortex is able to protect the cell when actomyosin contractility is inhibited or actin network integrity is disrupted. To inhibit actomyosin contractility, HeLa cells were treated with 15  $\mu$ M Bleb for 20 min, and AFM scanning was then conducted before and after point loading as in Fig. 1,  $A$  and  $B$ . Results revealed a decrease of surface stiffness after point loading (six of eight cells in  $E_2/E_1 < 1$ , and 2 cells in  $E_2/E_1 > 1$ , Fig. 2,  $A$  and  $B$ ; Fig. S3), indicating that actomyosin contractility is key to guarantee mechanical protection of the cortex. Next, 15  $\mu$ M Cyto D was used to treat HeLa cells for 20 min to disrupt actin network integrity. Interestingly, a trend of increased cell-surface stiffness after point loading was recorded with  $E_2/E_1 > 1$  for 6 of 10 cells,  $E_2/E_1 \approx 1$  for one, and  $< 1$  for three cells (Fig. 2,  $C$  and  $D$ ; Fig. S3). Such an enhancement was presumably caused by actin abnormal clustering because Cyto D treatment could induce disruption of the actin network and the formation of actin foci or clumps (45–49). Also, cells treated with Cyto D lost the ability to recover their mechanical homeostasis after point loading, as can be seen in Fig. S4  $D$ . Thus, mechanical compression to those foci and clumps induced the increase of cell-surface stiffness after Cyto D treatment.

To eliminate the potential interference from the substrate, point loading was always performed above the nucleus in this work. This protocol also enabled us to investigate the contribution of physical condensation state of the nucleus in loading-induced surface stiffening because the condensation state and nuclear structure are also relevant to cell responses (50). The effect of chromatin condensation was then tested using TSA treatment in 100 nM for 24 h for HeLa cells, which inhibits histone deacetylase 1 and 2 and induces chromatin decondensation (51). Results also revealed a decrease of cell-surface stiffness after point loading with  $E_2/E_1 < 1$  for eight of nine cells and  $E_2/E_1 \approx 1$  for

another one (Fig. 2,  $E$  and  $F$ ; Fig. S3), implying chromatin decondensation would largely weaken cortex's protection to the cell. Collectively, mapping in situ cell-surface mechanical property before and after point loading exhibited that the cell cortex is stiffened with higher mechanical strength after point loading, and actomyosin contractility, actin network integrity, and nuclear condensation state were critical to maintain the stiffening response. Thus, the stiffening of the cell cortex after point loading hinted its protection role for the cell from external disruption.

### Stiffened cell cortex is modeled as structural protection to mechanical loading

To further explore the protective role of cell cortex stiffening after point loading, the changes in stress, strain, and displacement fields in a model cell were investigated through mechanical modeling using the finite element method. The geometry of model cell was depicted in Fig. S1  $D$ . Cytoplasm (cell cortex) and the nucleus were included in the simplified model, and neo-Hookean hyperelastic material was adopted in the modeling. A pyramid AFM indenter, representing a PF-QNM-LC probe used in AFM experiments with assumptive infinite stiffness, was set on the top of the cell.

The simulations were performed with tip radius of 500 nm to reproduce comparable loading force (a constant force of 5 nN) and indentation depth of AFM experiments (Fig. S1  $D$ ) upon ruling out the mesh-size dependence and high-strain-induced divergence (see details in Materials and Methods). The stiffness of cytoplasm or the nucleus was set as  $E_c = 1, 3, \text{ or } 5$  kPa or  $E_n = 1.5, 4.5, \text{ or } 7.5$  kPa (32,33), respectively, with 1.5-fold greater stiffness for the latter (Fig. 3; Fig. S5). The Poisson's ratio was set as 0.36 (34). The effect of cortex stiffening was evaluated by increasing the cortex stiffness to 1.35-fold based on the upper limit value of  $E_2/E_1$  in Fig. 1  $B_4$  when the corresponding nucleus stiffness kept unchanged. Fig. 3 exhibited the von Mises stress  $\sigma_{\text{von}}$ , maximum strain  $E$ , and magnitude of deformation  $U$  of the deformed cell when loading in 5 nN with the mediate stiffness settings of  $E_c = 3$  kPa and  $E_n = 4.5$  kPa. Compared with the values in the absence of cortex stiffening (Fig. 3,  $A_1$ – $C_1$ ), those with cortex stiffening resulted in 1.4, 42.9, and 10.8% decrease in maximal  $\sigma_{\text{von}}$ ,  $E$ , and  $U$  for the cortex, respectively, and yielded 14.4, 17.6, and 7.2% decrease for the nucleus (Table 1). The higher reduction of maximum  $\sigma_{\text{von}}$  and  $E$  for the nucleus indicated that cortex stiffening strengthened structural protection to the nucleus. Further parametric analyses upon  $E_c = 1$  and 5 kPa,  $E_n = 1.5$  and 7.5 kPa showed similar tendency of structural protection of the stiffened cortex to the nucleus, in which the extent of protection in the case of  $E_c = 1$  kPa and  $E_n = 1.5$  kPa (Fig. S5,  $A$ – $C$ ) was similar to that of  $E_c = 3$  kPa and  $E_n = 4.5$  kPa (Fig. 3,  $A$ – $C$ ; Table 1). The reduction extent of maximum  $\sigma_{\text{von}}$  and  $E$  was slightly lower in the case of  $E_c = 5$  kPa and  $E_n = 7.5$  kPa (Fig. S5,

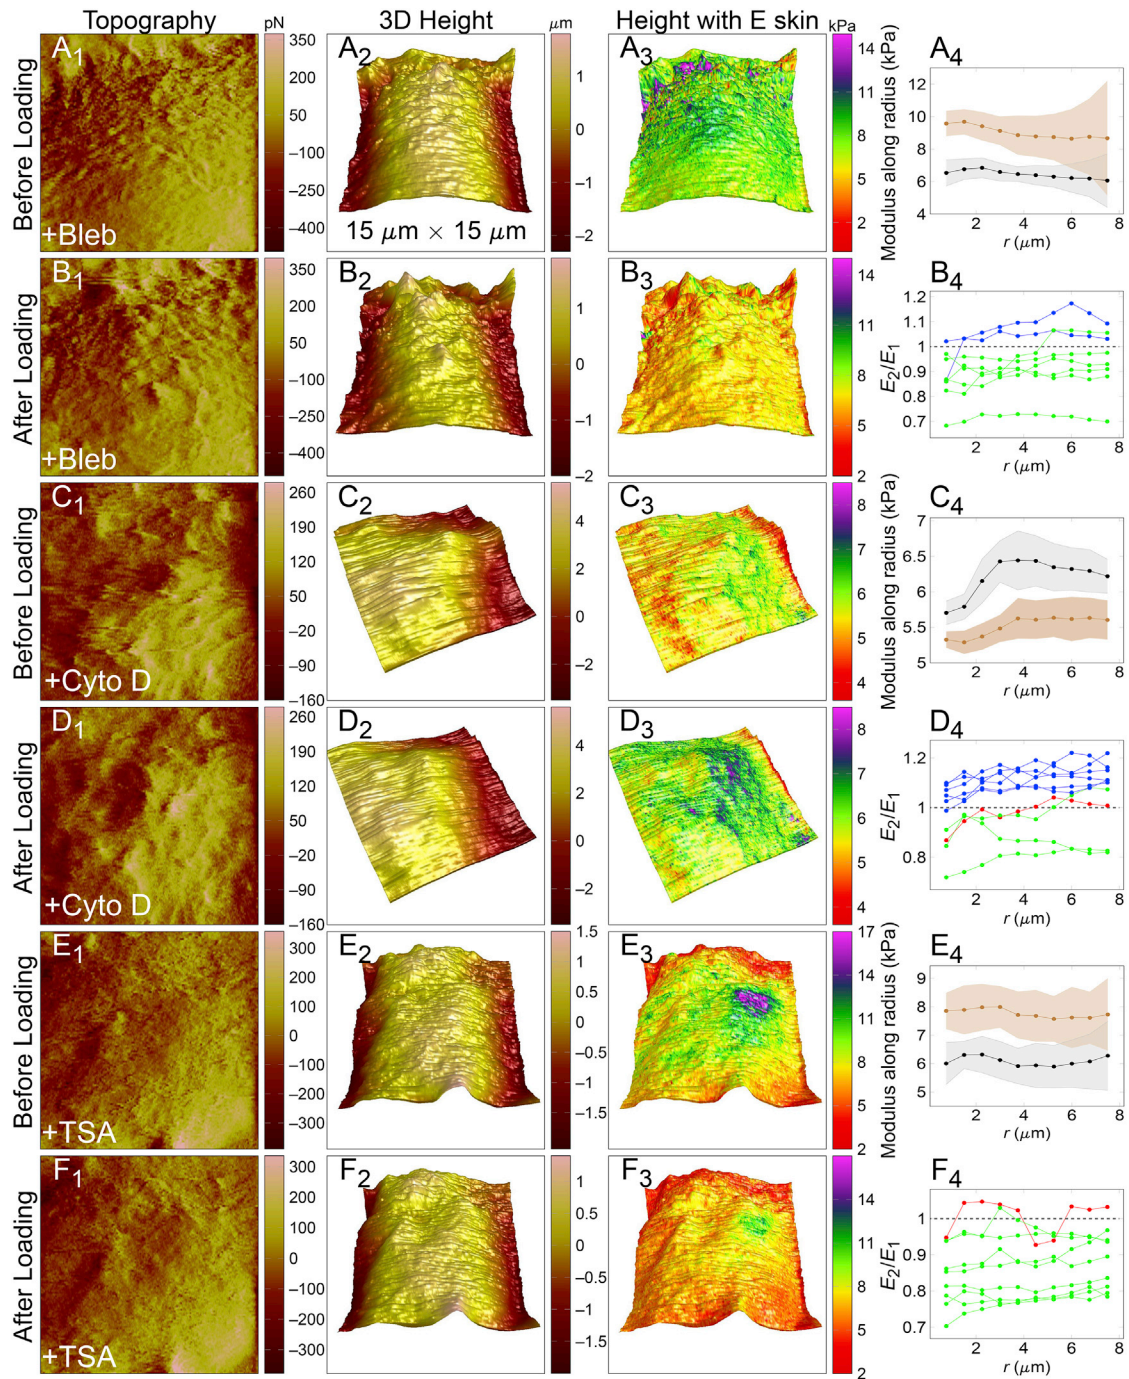

FIGURE 2 Comparisons of topography, 3D structure, and elasticity before and after point loading of HeLa cells upon various inhibitors. (A and B) For cells treated with 15  $\mu\text{M}$  Bleb for 20 min, AFM scanning in a 15  $\times$  15  $\mu\text{m}$  region was first performed on the top of the nucleus and AFM tip, then point-loaded near the center of the region in 5 nN/3 min. After loading, scanning at the same region was performed again. Related results of cells treated with 15  $\mu\text{M}$  Cyto D for 20 min or with 100 nM TSA for 24 h were shown in (C)–(F), respectively. The first column shows the topography of the scanned region, the second the 3D height mapping, and the third the Young's modulus  $E$  mapped to 3D height images. (A<sub>4</sub>), (C<sub>4</sub>), and (E<sub>4</sub>) from the fourth column showed the representative  $E$  distributions before (*brown*) and after (*black*) the 3-min point loading for Bleb, Cyto D, and TSA treatment, respectively. The principle of extracting and computing  $E$  was the same as in Fig. 1. (B<sub>4</sub>), (D<sub>4</sub>), and (F<sub>4</sub>) from the fourth column depicted the ratio of  $E$  before (named  $E_1$ )/after (named  $E_2$ ) point loading for Bleb, Cyto D, and TSA treatment, respectively, with  $E_2/E_1 > 1$  in blue,  $\sim 1$  in red, and  $< 1$  in green. Here,  $E_2/E_1 = 1$  as horizontal dashed lines was used for reference. Each line denoted one sample, and all samples were from two to three repeats. To see this figure in color, go online.

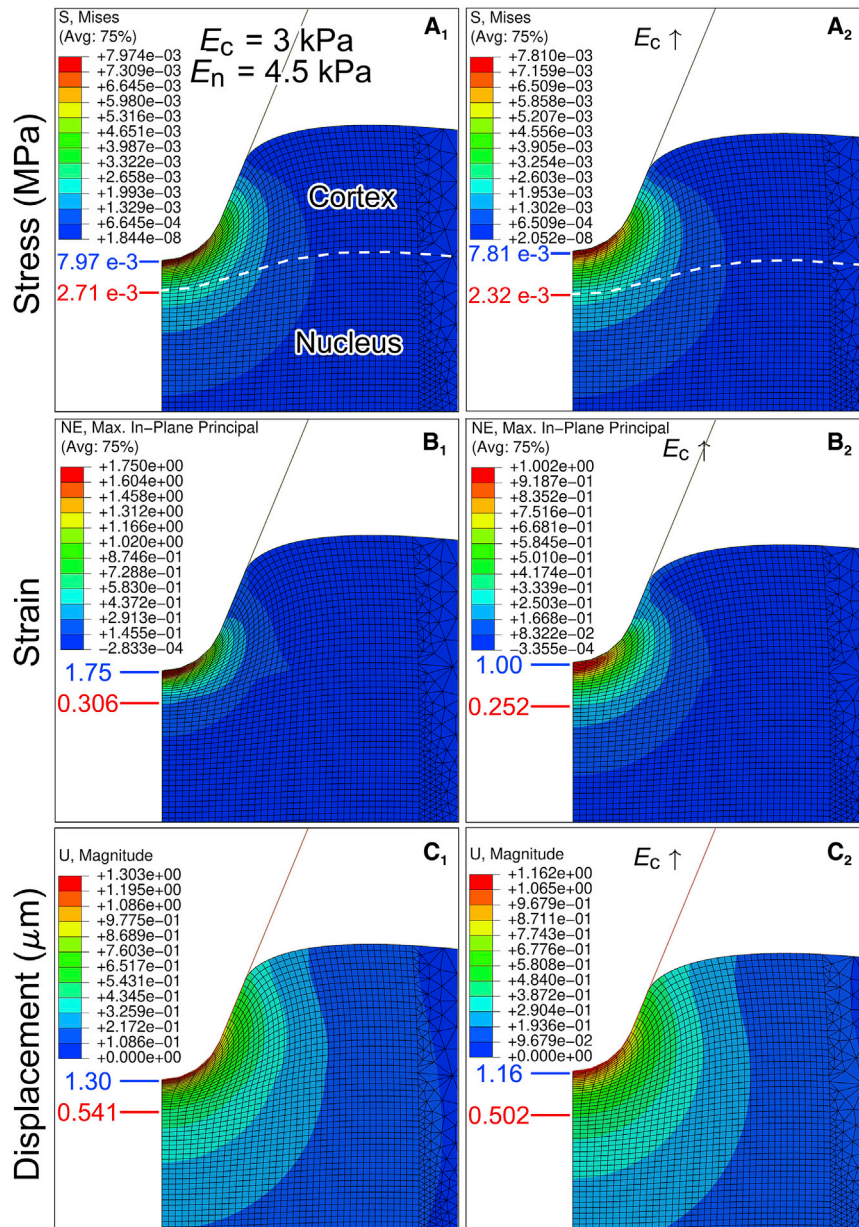

FIGURE 3 Mechanical modeling of the effect of cortex stiffening on nucleus mechanics. (A–C) Distributions of von Mises stress  $\sigma_{\text{von}}$ , maximum strain  $E$ , and magnitude of deformation  $U$ . The results of control settings with  $E_c = 3$  kPa and  $E_n = 4.5$  kPa (subscript “c” denotes the cytoplasm and “n” the nucleus) were shown in (A<sub>1</sub>), (B<sub>1</sub>), and (C<sub>1</sub>) and those of cortex-stiffening settings with  $E_c' = 1.35 E_c$  ( $E_c \uparrow$ ) and  $E_n = 4.5$  kPa are shown in (A<sub>2</sub>), (B<sub>2</sub>), and (C<sub>2</sub>), respectively. Blue lines and values denote maximum  $\sigma_{\text{von}}$ ,  $E$ , and  $U$  of cortex, and red lines and values were for the nucleus. Loading force was 5 nN. To see this figure in color, go online.

D–F; Table 1). The impact of different Poisson’s ratios (0.36 and 0.49 (34,52)) was also evaluated, and the results exhibited a similar trend (data not shown). Interestingly, the results with varied cortex stiffness revealed similar outcomes that the stiffened cortex could largely reduce maximum strain in cell cortex ( $\sim 40\%$ ) but slightly decreased the stress ( $< 3\%$ , Table 1), implying that the mechanical protection of cell cortex is likely stress-resistant.

### Actin reorganization is induced by point loading

The actin network is responsive to diverse mechanical stimuli, and mechanical protection of the cell cortex after point loading might be a hint of actin reorganization. To

investigate actin reorganization more profoundly, an in-house-customized, flat-ended AFM probe (Fig. S1, with tip diameter  $1.5\text{--}2\ \mu\text{m}$ ) was used to load the cells, attempting to cause the stress and strain redistribution more widely than pyramid probes (Fig. S6). Here, the geometrical jump at the periphery of the tip (a ring when considering the model as axisymmetric) could incur a large increase of stress (Fig. S6 A) and strain (Fig. S6 B), even though the change in displacement showed a different pattern.

Varied loading forces of 2.5, 5, and 10 nN and durations of 1 and 3 min were applied, and the loading site was also set near the center of cells to exclude the potential interference from basal stress fibers. Typical actin distribution of

**TABLE 1** Maximum von Mises Stress  $\sigma_{\text{von}}$ , Maximum Strain  $E$ , and Magnitude of Deformation  $U$  of the Cytoplasm, Cell Cortex, and the Nucleus in Simulations Using Different Stiffness Settings

| Stiffness (kPa)      | Symbols <sup>a</sup> | S ( $\sigma_{\text{von}}$ , MPa) | Max. NE <sup>b</sup> ( $E$ ) | $U$ ( $\mu\text{m}$ ) | $\Delta$ (S, NE, $U$ ) <sup>c</sup> |
|----------------------|----------------------|----------------------------------|------------------------------|-----------------------|-------------------------------------|
| $E_c = 1, E_n = 1.5$ | C                    | 2.66e-3                          | 1.75                         | 1.30                  | -2.6%, -43.3%, -10.8%               |
|                      | C ( $E_c \uparrow$ ) | 2.59e-3                          | 0.992                        | 1.16                  |                                     |
|                      | N                    | 9.02e-4                          | 0.306                        | 0.541                 | -14.7%, -18.6%, -7.8%               |
|                      | N ( $E_c \uparrow$ ) | 7.69e-4                          | 0.249                        | 0.499                 |                                     |
| $E_c = 3, E_n = 4.5$ | C                    | 7.92e-3                          | 1.75                         | 1.30                  | -1.4%, -42.9, -10.8%                |
|                      | C ( $E_c \uparrow$ ) | 7.81e-3                          | 1.00                         | 1.16                  |                                     |
|                      | N                    | 2.71e-3                          | 0.306                        | 0.541                 | -14.4%, 17.6%, -7.2%                |
|                      | N ( $E_c \uparrow$ ) | 2.32e-3                          | 0.252                        | 0.502                 |                                     |
| $E_c = 5, E_n = 7.5$ | C                    | 8.44e-3                          | 0.746                        | 0.919                 | -0.7%, -39%, -12.9%                 |
|                      | C ( $E_c \uparrow$ ) | 8.38e-3                          | 0.455                        | 0.800                 |                                     |
|                      | N                    | 2.46e-3                          | 0.143                        | 0.320                 | -9.3%, -10.5%, -5.6%                |
|                      | N ( $E_c \uparrow$ ) | 2.23e-3                          | 0.128                        | 0.302                 |                                     |

<sup>a</sup>C, cytoplasm (cell cortex); N, nucleus;  $E_c$ , cortex stiffness;  $E_n$ , nucleus stiffness;  $E_c \uparrow$ , 1.35-fold increased cortex stiffness.

<sup>b</sup>Nominal strain.

<sup>c</sup>Reduced percentage of  $\sigma_{\text{von}}$ , maximum strain  $E$ , and magnitude of deformation  $U$  after increasing cortex stiffness. *Italic values are for the nucleus.*

HeLa cells showed that the actin reorganization was dependent on both loading force and duration (Fig. 4, A–D). Local actin intensity enhancement in the loading site of 10 nN/3 min (Fig. 4 D, as indicated using *white arrows*) was readily captured than in other loading groups (Fig. 4, A–C). A corresponding cross section along the white dashed line of the loading site (Fig. 4 D) showed obvious fluorescence enhancement (Fig. 4 E) with quantified actin fluorescence intensity peak (Fig. 4 F). Quantitative analyses and comparisons of relative fluorescence intensity (RFI) of actin among all the cases indicated that the longer the loading duration is, the higher local actin RFIs are, even though only the case of 10 nN/3 min group presented a significant difference to other cases. In addition, the RFI increased with loading force at the long duration of 3 min but not at the short duration of 1 min (Fig. 4 G). Consistent results were obtained for the corresponding ratio of the cells with distinguishable enhancement of local actin intensity (Fig. 4 H). Moreover, force dependence of local actin intensity enhancement after point loading using AFM probes was also tested in HF cells with the same loading duration of 3 min. Similar results were found, with the higher loading forces of 5 and 10 nN resulting in a more significant increase of RFI than that of 2.5 nN with full responses for all the tested cells (Fig. S7).

Similar to those drug treatments in Fig. 1, HeLa cells treated with Bleb, Cyto D, and TSA were point-loaded to test how those drugs affect actin reorganization under a typical loading of 10 nN/3 min. The results exhibited significant decrease of actin reorganization for all three drug treatments, even though the extent of the decrease for Bleb treatment was slight lower than the two others (Fig. 4 I; the related fluorescence intensity images (SiR-actin or Lifeact-RFP-stained) were not shown). Taken together, these data indicated that the protective roles of the cell cortex are positively correlated with actin reorganization underneath the cortex.

### Point loading induces rapid enhancement of local actin intensity

The aforementioned actin reorganization is a time-dependent, dynamic process. Here, actin reorganization dynamics under point loading were further investigated using microneedle with tip radius of around 1.5  $\mu\text{m}$  (Fig. S1 B). After staining nuclei (Hoechst 33342) and F-actin (SiR-Actin) in live HeLa cells, the microneedle was then used to point load the cell from above the nucleus. The feasibility of microneedle loading was first confirmed with the similar observations that the local actin intensity was enhanced upon loading and the drug treatment resulted in decreased RFI (Fig. S8). Thus, time series along with 3D reconstruction protocol (“3DR” + “TS”) was adopted to monitor actin dynamics upon confocal microscopy. Before loading the cell, the focal plane was set at around the middle height of the cell as in Fig. S1 C. The needle was in hover at the first frame (first 10 s, Fig. 5,  $A_1$  and  $B_1$ ) on the top of the cell and then approached to the focal plane (indentation depth 3–5  $\mu\text{m}$ ) at the second frame (10–20 s, Fig. 5,  $A_2$  and  $B_2$ ). During the course of imaging, local actin intensity was detected as shown in the zoomed region in dash-boxed regions with irregularly dashed curves (Fig. 5,  $A_{1-6}$ ). Quantitative RFI along the white dotted line was shown in Fig. 5 C, and a sharp enhancement of actin fluorescence after point loading was detected by comparing the lines of 20–60 s to that of original 10 s. Also, mean RFI of actin inside the irregularly dashed regions in the inserts of Fig. 5 A revealed the sharp enhancement in the second frame and the sequentially slow decay in the followed frames (Fig. 5 D). In fact, the actin reorganization might appear in even faster dynamics as shown in only “TS” mode for both HeLa cells (Fig. S9, A–F) and HUVECs (data not shown). To confirm the fast actin dynamics upon point loading, we further applied “3DR” + “TS” mode with only the upper half of the cell being reconstructed and five to six slices were



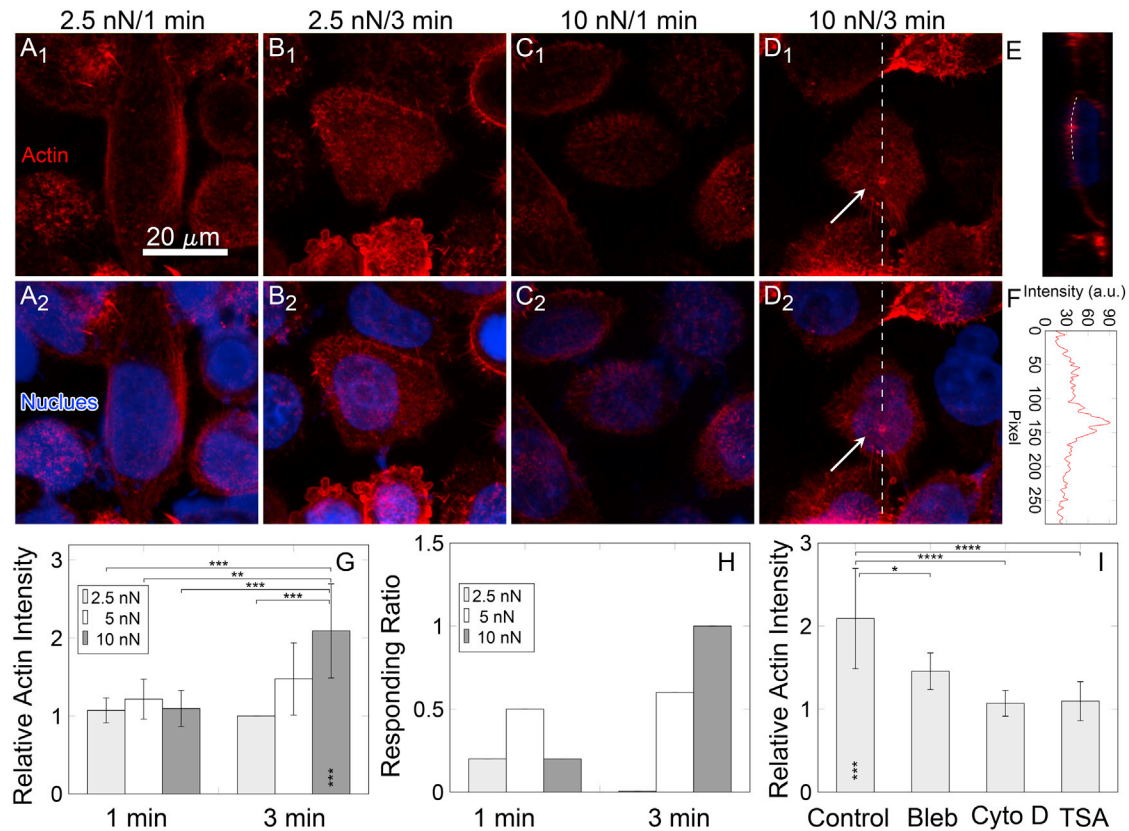

**FIGURE 4** Loading force and duration dependences of local actin fluorescence intensity of HeLa cell upon AFM assay. Here, force values of 2.5, 5, and 10 nN and loading durations of 1 and 3 min were applied. (A<sub>1</sub>)–(D<sub>1</sub>) depict the cell responses (actin in red) after loading for 1 min with force of 2.5 nN (2.5 nN/1 min), 3 min with force of 2.5 nN (2.5 nN/3 min), 1 min with force of 10 nN (10 nN/1 min), and 3 min with force of 10 nN (10 nN/3 min). Images for 1 and 3 min with force of 5 nN are not shown for clarity. Stained nuclei (blue) were merged in (A<sub>2</sub>)–(D<sub>2</sub>). (E) A typical cross section as indicated using white dashed line and white arrow in (D) shows the distribution of local actin intensity. (F) Fluorescence intensity (in a.u.) of actins along the white dotted line in (E) (along the membrane) was extracted and replotted. (G–I) Quantitative statistics of relative fluorescence intensity (RFI) are shown in (G). Percentage of cells with increased local actin intensity is shown in (H). Changes of mean RFI for the cells treated with Bleb, Cyto D, and TSA in 10 nN/3 min are shown in (I). Asterisks inside the bars of (G) and (I) showed significant difference of this bar to the baseline “1.” \* $p < 0.05$ , \*\* $p < 0.01$ , \*\*\* $p < 0.001$ , \*\*\*\* $p < 0.0001$ .  $n = 5$ –8 for each condition. To see this figure in color, go online.

captured in total with faster scanning velocity of 5 s/frame (Fig. S9, G–J). The results showed a similar trend with those of “TS” only mode (Fig. S9, A–F) or whole-cell “3DR” + “TS” mode (Fig. 5). Additionally, FRAP experiments were also performed to visualize actin dynamics induced by point loading. The results showed that the half-time  $\tau_{1/2}$  of actin recovery upon point loading was significantly faster ( $45.6 \pm 25.7$  s) than that in the absence of loading ( $130.1 \pm 53.6$  s) (Fig. S9, K–M). This significant speed-up at tens of seconds also gave a hint on the quick actin reorganization dynamics upon point loading.

To further elucidate the reversibility of actin reorganization, the recovery dynamics of corresponding actin fluorescence after point unloading was also monitored using the imaging mode of “3DR” + “TS.” After point loading the cell for 50 s, imaging capture was started, and the needle was withdrawn after the first frame (Fig. 6, A<sub>1-2</sub> and B<sub>1-2</sub>). RFI of actin along the dotted lines at the loading region presented an abrupt decrease right after needle with-

drawal (Fig. 6 C, lines of 20–60 s to original 10 s in red line), followed by the evolution of gradual decay relative to that of original decrease (Fig. 6 D). The recovery curve was fitted using an exponential expression  $I(t) = I_{\text{base}} + \exp(-t/\tau_0)$  (red line), and the resulting half-life time was  $\tau_{1/2} = 14.3$  s. Longer loading of 2 min 50 s before unloading did not affect the recovery dynamics with similar recovery phases and a comparable half-life time of 14.8 s (Fig. S10). Collective results of local actin organization upon force loading (Fig. 5; Fig. S9) and actin recovery after unloading (Fig. 6; Fig. S10) revealed that the former had faster dynamics than the latter, and the recovery dynamics was less sensitive to loading duration.

## DISCUSSION

How the cellular cytoskeleton responds to different mechanical loadings has been widely investigated because the cytoskeleton empowers cellular structural integrity and

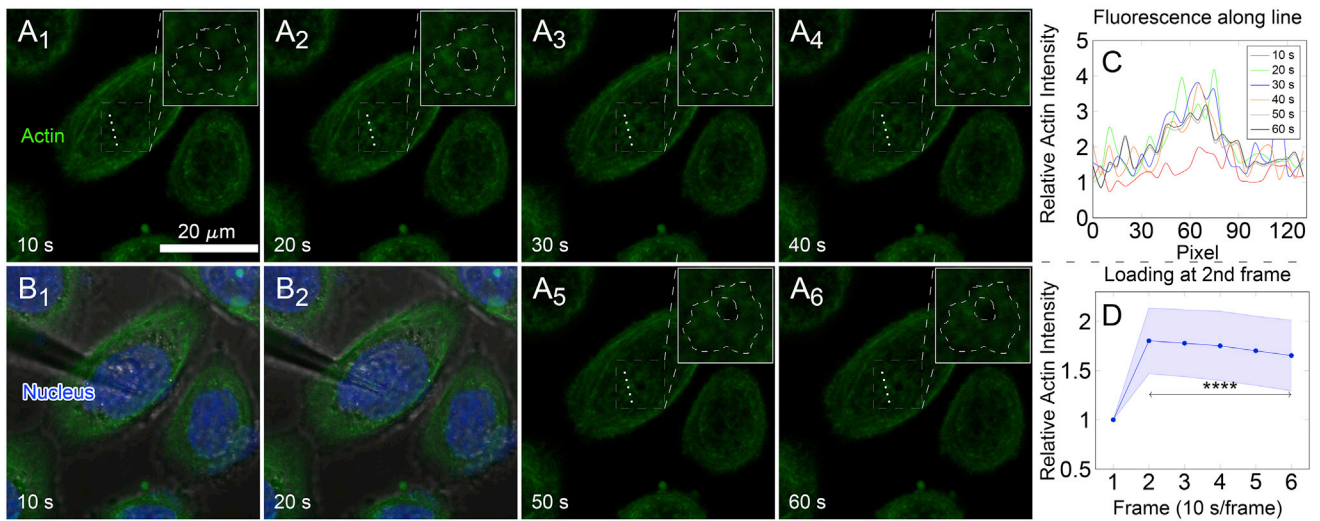

**FIGURE 5** Loading dynamics of local actin fluorescence intensity enhancement at the point loading site of HeLa cells upon microneedle indentation assay. ( $A_1$ )–( $A_6$ ) denote the serial images of actin (*green*) fluorescent intensity in 1 min with 3D reconstruction every 10 s (thus, six frames in total). The needle was in hover at the first frame (first 10 s) as in ( $A_1$ ) and ( $B_1$ ) and then loaded on the top of the nucleus (*blue*) at the second frame (10–20 s) as in ( $A_2$ ) and ( $B_2$ ). Dashed square boxes in ( $A_1$ )–( $A_6$ ) depicted the region of local actin intensity enhancement as magnified in inserts (the region with local actin intensity enhancement was embraced by an irregular dashed contour, the central hole of which indicated the site occupied by the needle). (*C*) Spatiotemporal distribution of RFI along the white dotted line in dashed boxes in ( $A_1$ )–( $A_6$ ) is shown. (*D*) Evolution of mean RFI  $\pm$  SD in the entire dashed regions in inserts is shown. Asterisks showed significant difference among two to six frames to the first one. \*\*\*\* $p < 0.0001$ .  $n = 19$  from two repeats. To see this figure in color, go online.

mechanical stability to resist physical disturbances. It also plays crucial roles in various functions of cell migration, division, polarization, communication, endocytosis, vesicle transmission, autophagy, receptor recycling, invasion, etc.

(53,54). There are many mechanical manipulations to investigate the cytoskeletal responses for the cells exposed to different mechanical stimuli such as acoustic, magnetic, or optical tweezers; AFM; microneedle indentation; and

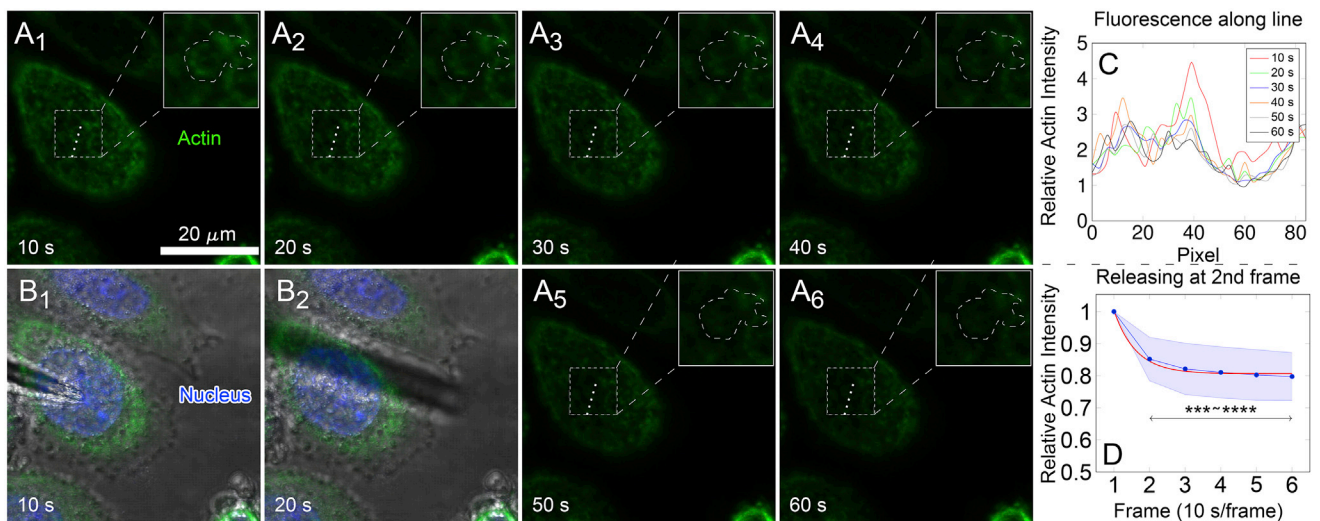

**FIGURE 6** Recovery dynamics of local actin fluorescence intensity of HeLa cells after removing the microneedle from the loading site. ( $A_1$ )–( $A_6$ ) denoted the serial images of actin (*green*) fluorescent intensity in 1 min with 3D reconstruction every 10 s (thus six frames in total). The needle had been loaded on the top of nucleus for 50 s before collecting fluorescence. After finishing first frame, the needle was lifted apart and kept in hover as in ( $B_1$ ) and ( $B_2$ ). Dashed square boxes in ( $A_1$ )–( $A_6$ ) depicted the region of local actin intensity enhancement as magnified in inserts (the region of local actin intensity enhancement was embraced by *irregular dashed contour*). (*C*) Spatiotemporal distribution of RFI along the white dotted line in dashed boxes in ( $A_1$ )–( $A_6$ ). (*D*) Evolution of mean RFI  $\pm$  SD (*blue*) in the entire dashed regions in inserts. The mean RFI data was then fitted using an empirical equation,  $I(t) = I_{\text{base}} + \exp(-t/\tau_0)$  (*red line*), in which  $I_{\text{base}}$  denotes the baseline fluorescence and  $\tau_0$  the characteristic time. Half-life time of RFI decay was obtained from curve fitting as  $\tau_{1/2} = t_1 + \tau_0 \ln 2 = 14.3$  s when  $t_1 = 10$  s. Asterisks showed significant difference among two to six frames to the first one. \*\*\* $p < 0.001$ , \*\*\*\* $p < 0.0001$ .  $n = 9$ . To see this figure in color, go online.

micropipette aspiration (55). However, the majority of those mechanical property measurements are based on bulk responses of mechanical features to uncover the statistically averaged properties after a series of measurements, but in situ mechanical property measurements before and after mechanical loading of single cells are still not fully understood. In this study, an AFM assay was conducted to map the cell-surface mechanical property of single cells in situ before and after mechanical point loading. A mechanical model was also proposed to comprehend mechanical property variations upon AFM mapping, and then flat-ended AFM probes and microneedles were used to explore dynamical responses of cytoskeleton after point loading the cell. The results indicated that actin reorganization induced by point loading could act as protection shell with increased mechanical properties, resulting in corresponding decrease of maximum stress ( $-9$  to  $-15\%$ ) and maximum strain ( $-10$  to  $-19\%$ ) to the nucleus. This protective effect (i.e., decrease in stress and strain) was significant, though less enriched to the extent that actin cap favors decreasing maximum stress of the nucleus by  $35\%$  when cells undergoes dynamic stretch (16). In our microneedle experiments, actin reorganization upon point loading took place quickly within 10 s. Actually, similar rapid actin reorganization within 10 s had been recorded when loading the cell periphery using a sphere probe (56). Also, the cytoskeleton recovery dynamics after unloading, which has not been well investigated in the existing works, was elaborated in this work (with a half-life time of  $\sim 14$  s).

Impacts of dynamic and cyclic loading on actin reorganization are extensively investigated in cell biophysics. It is well known that an in vitro actin network test presents frequency-dependent stress stiffening under dynamic loading (14). Integrin-mediated actin recruitment is also found inside a cell upon dynamic loading using receptor-coated magnetic beads (57). Such actin recruitment results in the enhancement of cell mechanics (58). In similar tests of actin dynamics and cellular mechanics upon static AFM loading (30,59), the studies exhibit that stress fibers are rearranged in the whole cell, and localized mechanical perturbation can induce responses of the whole cell (59). Specifically, no change of cellular stiffening is found before and after 5–20 nN point loading for 10 min (30). However, the obvious stiffness enhancement is observed after point loading in this work, almost over the entire mapping region of  $15 \mu\text{m}$  in length, even though the actual length of the point loading indentation was around  $4 \mu\text{m}$  (Fig. S4 D). This difference is presumably attributed to the following aspects: 1) mechanical measurement method. We performed in situ mechanical mapping that continuously spans over an entire region of interest centered on the loading site upon PF-QNM mode. In comparison to the Ramp mode with limited and discrete data points, applying the PF-QNM mode offers the larger data sets (two to three orders of magnitude higher) and the more detailed profile of me-

chanical features with higher spatial resolution. This enables us to define the mechanical alteration around the loaded point; 2) data analysis method. We quantified the in situ mechanical change upon the same region before and after point loading and compared the mechanical difference for each cell alone, but not the averaged changes of all the tested cells in a bulk way. This elaborative data analysis avoids the covering up of detailed features of an individual cell. Moreover, static point-loading-induced actin reorganization was rapid as  $< 10$  s. Those additional tests, by reconstructing only half of the cell after point loading, confirmed the above results and indicated that actin dynamics after point loading may even be faster, up to  $< 5$  s (Fig. S9, G–M). It is noticed that the fast actin dynamics presented here is different from the slower dynamics under dynamic loading reported in the literature, in which it takes 630 s for actin stiffening and obvious actin recruitment after 1440-s loading with the smaller loading magnitude (58). Collectively, we proposed a novel, to our knowledge, way to in situ probe mechanical changes of cell-surface stiffness before and after point loading with high spatial resolution to uncover cell cortex stiffening around the loading site. We also integrated the live-cell imaging with microneedle point loading to quantify the fast dynamics of actin reorganization ( $< 10$  s) upon 3D-reconstructed, time-lapsed images of actin remodeling. In addition, the tests using flat-ended AFM probes reveal that the larger the applied force and the longer the loading time are, the more pronounced actin reorganization is. Meanwhile, computational modeling helps to propose the structural protection from the stiffened cell cortex. Thus, the in situ, high-spatial-resolution mechanical mapping and the combination of experimental measurements and mechanical modeling further our understanding of the transmission of localized mechanical forces into an adherent cell.

Cell density or confluence is known to intervene in many processes such as cell-cell communication, cell survival, and cell responses to external signals (60–63). Testing the relevance between cell density and cell responses to point loading indicated that local actin reorganization was still captured stably in low seeding density of 1/8 high density (Fig. S11,  $A_1$ – $F_1$ ), similar to those in high density (Fig. S11,  $A_2$ – $F_2$ ). Quantitative statistics exhibited similar tendencies in that the higher the loading force and duration, the higher the RFI (Fig. S11 G) and responding ratio (Fig. S11 H) are, regardless of cellular seeding density. These results indicated that a cell locating within monolayer or individually presents similar mechanical responses to point loading, at least qualitatively.

To rule out the potential interference from basal stress fibers and strong actin signal along cell periphery, point loading was always performed above the nucleus (mostly geometrical center of the cell). Thus, it is required to confirm if the nucleus is damaged mechanically. In fact, no matter what the state of actin network integrity is,

DNA damage around the point loading site was not evident (data not shown), indicating the self-resistance capacity of the nucleus to external mechanical loadings. Also, the differences of actin reorganization after point loading on cell periphery was tested using the well-spread HUVECs with fully extended periphery. The disruption of stress fibers and retraction of actin network was readily captured around the point loading site using a microneedle (Fig. S12, A–D). Meanwhile, when AFM point loading was right above a stress fiber, the disruption of that stress fiber was able to be captured (Fig. S12, E–G). From this perspective, the responses of the cell cortex and stress fiber were different upon point loading.

The potential impacts of cell viscoelasticity were also evaluated for both AFM and microneedle loading assays. First, we double-checked the cell deformation recovery after AFM point loading. The results showed that the cells had almost recovered to their unloaded states except those of the Cyto D-treated group (Fig. S4), indicating that the role of cell creeping could be neglected for cell elasticity mapping, at least, within this experimental setting. Second, we attempted to outline the cellular viscous features in the microneedle loading tests. For example, the data collected from “3DR” + “TS” mode exhibited that the cellular deformation occurs at the second frame and recovers partially during the followed four frames (Fig. S13 A), indicating the existence of stress relaxation. This relaxing may be the reason for the slow decrease of actin intensity during point loading (Fig. 5 D; Fig. S9, E and F). Meanwhile, mechanical unloading resulted in quick recovery of cellular deformation after 1- or 3-min loading (Fig. S13, B and C), implying the reasonability of neglecting the viscous effect as in AFM point loading tests. It is also noticed that these features are consistent with the results of fluorescence recovery (Fig. 6 D; Fig. S10 D). Collectively, cellular viscous effect is represented by relaxation/creeping during microneedle loading/unloading and also quick cellular deformation recovery when the loading is abrogated by AFM.

For the underlying mechanisms of mechanically induced actin reorganization, it is still an open question as to what the mechanotransductive pathways for cell responses to the local point loading are. For example, a perinuclear actin rim could be formed along with actin filaments around nuclear periphery soaring in <10 s when loading cell periphery using sphere probes in National Institutes of Health 3T3 cells, in which the process is possibly mediated by formin protein (56). Fast scratch upon cell surface induces fast F-actin to G-actin homeostasis, and the force-induced actin nucleation is also mediated by formin protein mDia1 (64). Also, actin nucleation protein, Arp2/3, may be another candidate for the underlying process (65). Mechanical point loading may induce rapid lipid raft disruption and cause the altered actin dynamics (66) because actin tethers raft clusters directly (67). Mechanical loading on the cell surface

may also prompt actin recruitment by activating membrane-resided integrin and downstream talin (68). Although this study focused on the features of actin reorganization dynamics and the corresponding cell mechanical property induced by point loading, it is worthwhile to investigate intrinsic signaling in the future. Other technical issues should also be fixed in the future works. One is that the sharp tip geometry caused a divergence problem in our simulations, as reported in the literature (35,36). To load the cell effectively, a blunted tip with radius of 500 nm was adopted to run the simulations (Fig. 3; Fig. S5) because only in that way could we apply a large indentation force of 5 nN to the cell. In addition, the idealized modeling is to simulate the cortex-stiffening dynamics after constant force loading upon those complicated signal pathways of actin reorganization, which should be a future focus. The motivation for choosing this simplified model is just to elucidate the effect of cortex stiffening on mechanical protection but not the underlying mechanisms of occurrence of cortex stiffening. Another issue is that it is difficult to obtain cell-surface mechanics mapping along with real-time actin reorganization because the PF-QNM-LC probe used for mechanics mapping is not able to load the cell in large force amplitude, and thus the flat-ended probe is chosen to detect local actin reorganization after point loading.

## CONCLUSIONS

In this work, cortex stiffening of single cells was specialized after point loading the cell in situ, playing a role of structural protection to the cell/the nucleus. Such stiffening was attributed to the localized actin reorganization. This actin reorganization presented a fast dynamics (<10 s) at the vicinity of the loading site. These localized responses of a cell are different from those bulk responses to applied mechanical stimulus in a force- and duration-dependent manner.

## SUPPORTING MATERIAL

Supporting Material can be found online at <https://doi.org/10.1016/j.bpj.2019.09.012>.

## AUTHOR CONTRIBUTIONS

J.H., S.L., and M.L. designed the research and wrote the article. J.H. and W.H. carried out all experiments. J.H. and S.C. performed the simulations and analyzed the data.

## ACKNOWLEDGMENTS

The authors are grateful for the general gifts of flat-ended AFM probes provided by Dr. Bin Tang from Southern University of Science and Technology, HeLa cells by Dr. Feng Shao from National Institute of Biological Sciences, Beijing, and Lifeact-RFP plasmid by Dr. Zhu Zeng from Guizhou Medical University. We also thank Dandan Huang for her technical assistance in preparing HUVECs.

This work was supported by National Key Research and Development Program of China grant 2016YFA0501601, National Natural Science Foundation of China grants (31627804, 91642203, 31661143044, and 31570942), Frontier Science Key Project of Chinese Science Academy grant QYZDJ-SSW-JSC018, and Strategic Priority Research Program of Chinese Academy of Sciences grant XDB22040101.

## REFERENCES

- Chaudhuri, P. K., B. C. Low, and C. T. Lim. 2018. Mechanobiology of tumor growth. *Chem. Rev.* 118:6499–6515.
- Wang, J., D. Lü, ..., M. Long. 2014. Mechanomics: an emerging field between biology and biomechanics. *Protein Cell.* 5:518–531.
- Cheng, B., M. Lin, ..., F. Xu. 2017. Cellular mechanosensing of the biophysical microenvironment: a review of mathematical models of biophysical regulation of cell responses. *Phys. Life Rev.* 22–23:88–119.
- Yang, H., N. Li, ..., M. Long. 2017. Neutrophil adhesion and crawling dynamics on liver sinusoidal endothelial cells under shear flow. *Exp. Cell Res.* 351:91–99.
- Song, Z., K. Gupta, ..., H. Yu. 2017. Mechanosensing in liver regeneration. *Semin. Cell Dev. Biol.* 71:153–167.
- Tse, J. M., G. Cheng, ..., L. L. Munn. 2012. Mechanical compression drives cancer cells toward invasive phenotype. *Proc. Natl. Acad. Sci. USA.* 109:911–916.
- Damodaran, K., S. Venkatachalapathy, ..., G. V. Shivashankar. 2018. Compressive force induces reversible chromatin condensation and cell geometry dependent transcriptional response. *Mol. Biol. Cell.* 29:3039–3051.
- Qi, Y. X., Q. P. Yao, ..., Z. L. Jiang. 2016. Nuclear envelope proteins modulate proliferation of vascular smooth muscle cells during cyclic stretch application. *Proc. Natl. Acad. Sci. USA.* 113:5293–5298.
- Kaunas, R., P. Nguyen, ..., S. Chien. 2005. Cooperative effects of Rho and mechanical stretch on stress fiber organization. *Proc. Natl. Acad. Sci. USA.* 102:15895–15900.
- Zhang, C., L. Zhou, ..., M. Long. 2017. Mechanical remodeling of normally sized mammalian cells under a gravity vector. *FASEB J.* 31:802–813.
- Zhou, L., C. Zhang, ..., M. Long. 2018. Theoretical modeling of mechanical homeostasis of a mammalian cell under gravity-directed vector. *Biomech. Model. Mechanobiol.* 17:191–203.
- Swift, J., I. L. Ivanovska, ..., D. E. Discher. 2013. Nuclear lamin-A scales with tissue stiffness and enhances matrix-directed differentiation. *Science.* 341:1240104.
- Engler, A. J., S. Sen, ..., D. E. Discher. 2006. Matrix elasticity directs stem cell lineage specification. *Cell.* 126:677–689.
- Fletcher, D. A., and R. D. Mullins. 2010. Cell mechanics and the cytoskeleton. *Nature.* 463:485–492.
- Salbreux, G., G. Charra, and E. Paluch. 2012. Actin cortex mechanics and cellular morphogenesis. *Trends Cell Biol.* 22:536–545.
- Kim, J. K., A. Louhghalam, ..., D. H. Kim. 2017. Nuclear lamin A/C harnesses the perinuclear apical actin cables to protect nuclear morphology. *Nat. Commun.* 8:2123.
- Chambliss, A. B., S. B. Khatau, ..., D. Wirtz. 2013. The LINC-anchored actin cap connects the extracellular milieu to the nucleus for ultrafast mechanotransduction. *Sci. Rep.* 3:1087.
- Sen, B., Z. Xie, ..., J. Rubin. 2014. mTORC2 regulates mechanically induced cytoskeletal reorganization and lineage selection in marrow-derived mesenchymal stem cells. *J. Bone Miner. Res.* 29:78–89.
- Yu, M., X. Yuan, ..., J. Yan. 2017. mDia1 senses both force and torque during F-actin filament polymerization. *Nat. Commun.* 8:1650.
- Jaasma, M. J., W. M. Jackson, ..., T. M. Keaveny. 2007. Adaptation of cellular mechanical behavior to mechanical loading for osteoblastic cells. *J. Biomech.* 40:1938–1945.
- Osborn, E. A., A. Rabadzey, ..., J. H. Hartwig. 2006. Endothelial actin cytoskeleton remodeling during mechanostimulation with fluid shear stress. *Am. J. Physiol. Cell Physiol.* 290:C444–C452.
- Sato, M., M. J. Levesque, and R. M. Nerem. 1987. Micropipette aspiration of cultured bovine aortic endothelial cells exposed to shear stress. *Arteriosclerosis.* 7:276–286.
- Guo, M., A. F. Pegoraro, ..., D. A. Weitz. 2017. Cell volume change through water efflux impacts cell stiffness and stem cell fate. *Proc. Natl. Acad. Sci. USA.* 114:E8618–E8627.
- Di Ciano-Oliveira, C., A. C. Thirone, ..., A. Kapus. 2006. Osmotic stress and the cytoskeleton: the R(h)ole of Rho GTPases. *Acta Physiol. (Oxf.).* 187:257–272.
- Smith, P. G., L. Deng, ..., G. N. Maksym. 2003. Mechanical strain increases cell stiffness through cytoskeletal filament reorganization. *Am. J. Physiol. Lung Cell. Mol. Physiol.* 285:L456–L463.
- Chen, N. X., K. D. Ryder, ..., R. L. Duncan. 2000. Ca(2+) regulates fluid shear-induced cytoskeletal reorganization and gene expression in osteoblasts. *Am. J. Physiol. Cell Physiol.* 278:C989–C997.
- Wille, J. J., E. L. Elson, and R. J. Okamoto. 2006. Cellular and matrix mechanics of bioartificial tissues during continuous cyclic stretch. *Ann. Biomed. Eng.* 34:1678–1690.
- Na, S., A. Trache, ..., J. D. Humphrey. 2008. Time-dependent changes in smooth muscle cell stiffness and focal adhesion area in response to cyclic equibiaxial stretch. *Ann. Biomed. Eng.* 36:369–380.
- Morita, Y., T. Mukai, ..., S. Watanabe. 2013. Evaluation of stem cell-to-tenocyte differentiation by atomic force microscopy to measure cellular elastic moduli. *Cell Biochem. Biophys.* 66:73–80.
- Haase, K., and A. E. Pelling. 2013. Resiliency of the plasma membrane and actin cortex to large-scale deformation. *Cytoskeleton (Hoboken).* 70:494–514.
- Sprague, B. L., R. L. Pego, ..., J. G. McNally. 2004. Analysis of binding reactions by fluorescence recovery after photobleaching. *Biophys. J.* 86:3473–3495.
- Liu, H., J. Wen, ..., Y. Sun. 2014. In situ mechanical characterization of the cell nucleus by atomic force microscopy. *ACS Nano.* 8:3821–3828.
- Yokokawa, M., K. Takeyasu, and S. H. Yoshimura. 2008. Mechanical properties of plasma membrane and nuclear envelope measured by scanning probe microscope. *J. Microsc.* 232:82–90.
- Trickey, W. R., F. P. Baaijens, ..., F. Guilak. 2006. Determination of the Poisson's ratio of the cell: recovery properties of chondrocytes after release from complete micropipette aspiration. *J. Biomech.* 39:78–87.
- Vargas-Pinto, R., H. Gong, ..., M. Johnson. 2013. The effect of the endothelial cell cortex on atomic force microscopy measurements. *Biophys. J.* 105:300–309.
- Ng, L., H. H. Hung, ..., A. Grodzinsky. 2007. Nanomechanical properties of individual chondrocytes and their developing growth factor-stimulated pericellular matrix. *J. Biomech.* 40:1011–1023.
- Calzado-Martín, A., M. Encinar, ..., A. San Paulo. 2016. Effect of actin organization on the stiffness of living breast cancer cells revealed by peak-force modulation atomic force microscopy. *ACS Nano.* 10:3365–3374.
- Eghiaian, F., A. Rigato, and S. Scheuring. 2015. Structural, mechanical, and dynamical variability of the actin cortex in living cells. *Biophys. J.* 108:1330–1340.
- Schillers, H., I. Medalsy, ..., J. E. Shaw. 2016. PeakForce Tapping resolves individual microvilli on living cells. *J. Mol. Recognit.* 29:95–101.
- Tee, S. Y., J. Fu, ..., P. A. Janmey. 2011. Cell shape and substrate rigidity both regulate cell stiffness. *Biophys. J.* 100:L25–L27.
- Luo, Q., D. Kuang, ..., G. Song. 2016. Cell stiffness determined by atomic force microscopy and its correlation with cell motility. *Biochim. Biophys. Acta.* 1860:1953–1960.
- Duan, Y., A. M. Weinstein, ..., T. Wang. 2010. Shear stress-induced changes of membrane transporter localization and expression in mouse proximal tubule cells. *Proc. Natl. Acad. Sci. USA.* 107:21860–21865.

43. Ihalainen, T. O., L. Aires, ..., V. Vogel. 2015. Differential basal-to-apical accessibility of lamin A/C epitopes in the nuclear lamina regulated by changes in cytoskeletal tension. *Nat. Mater.* 14:1252–1261.
44. Chalut, K. J., M. Höpfler, ..., J. Guck. 2012. Chromatin decondensation and nuclear softening accompany Nanog downregulation in embryonic stem cells. *Biophys. J.* 103:2060–2070.
45. Schliwa, M. 1982. Action of cytochalasin D on cytoskeletal networks. *J. Cell Biol.* 92:79–91.
46. Stevenson, B. R., and D. A. Begg. 1994. Concentration-dependent effects of cytochalasin D on tight junctions and actin filaments in MDCK epithelial cells. *J. Cell Sci.* 107:367–375.
47. Sasse, F., B. Kunze, ..., H. Reichenbach. 1998. The chondramides: cytostatic agents from myxobacteria acting on the actin cytoskeleton. *J. Natl. Cancer Inst.* 90:1559–1563.
48. Wang, Z., A. K. T. Wann, ..., M. M. Knight. 2016. IFT88 influences chondrocyte actin organization and biomechanics. *Osteoarthritis Cartilage.* 24:544–554.
49. Reese, B. K., W. N. Holmes, and J. Cronshaw. 1994. Effects of cytochalasin D on the distribution of actin and ACTH-induced steroidogenesis in cultured embryonic adrenal gland cells from the Pekin duck (*Anas platyrhynchos*). *Cell Tissue Res.* 276:587–592.
50. Gerlitz, G., and M. Bustin. 2011. The role of chromatin structure in cell migration. *Trends Cell Biol.* 21:6–11.
51. Tóth, K. F., T. A. Knoch, ..., K. Rippe. 2004. Trichostatin A-induced histone acetylation causes decondensation of interphase chromatin. *J. Cell Sci.* 117:4277–4287.
52. Harris, A. R., and G. T. Charras. 2011. Experimental validation of atomic force microscopy-based cell elasticity measurements. *Nanotechnology.* 22:345102.
53. Rottnér, K., J. Faix, ..., E. Kerkhoff. 2017. Actin assembly mechanisms at a glance. *J. Cell Sci.* 130:3427–3435.
54. Chugh, P., and E. K. Paluch. 2018. The actin cortex at a glance. *J. Cell Sci.* 131:jcs186254.
55. Rodríguez, M. L., P. J. McGarry, and N. J. Sniadecki. 2013. Review on cell mechanics: experimental and modeling approaches. *Appl. Mech. Rev.* 65:060801.
56. Shao, X., Q. Li, ..., G. V. Shivashankar. 2015. Mechanical stimulation induces formin-dependent assembly of a perinuclear actin rim. *Proc. Natl. Acad. Sci. USA.* 112:E2595–E2601.
57. Glogauer, M., P. Arora, ..., C. A. McCulloch. 1997. Calcium ions and tyrosine phosphorylation interact coordinately with actin to regulate cytoprotective responses to stretching. *J. Cell Sci.* 110:11–21.
58. Icard-Arcizet, D., O. Cardoso, ..., S. Hénon. 2008. Cell stiffening in response to external stress is correlated to actin recruitment. *Biophys. J.* 94:2906–2913.
59. Guolla, L., M. Bertrand, ..., A. E. Pelling. 2012. Force transduction and strain dynamics in actin stress fibres in response to nanonewton forces. *J. Cell Sci.* 125:603–613.
60. Goldenberg, R. C., F. S. Fortes, ..., A. C. Campos de Carvalho. 2003. Modulation of gap junction mediated intercellular communication in TM3 Leydig cells. *J. Endocrinol.* 177:327–335.
61. Belleri, M., D. Ribatti, ..., M. Presta. 2005. Antiangiogenic and vascular-targeting activity of the microtubule-destabilizing trans-resveratrol derivative 3,5,4'-trimethoxystilbene. *Mol. Pharmacol.* 67:1451–1459.
62. Ferrie, A. M., O. D. Deichmann, ..., Y. Fang. 2012. High resolution resonant waveguide grating imager for cell cluster analysis under physiological condition. *Appl. Phys. Lett.* 100:223701.
63. Mauck, R. L., S. L. Seyhan, ..., C. T. Hung. 2002. Influence of seeding density and dynamic deformational loading on the developing structure/function relationships of chondrocyte-seeded agarose hydrogels. *Ann. Biomed. Eng.* 30:1046–1056.
64. Higashida, C., T. Kiuchi, ..., N. Watanabe. 2013. F- and G-actin homeostasis regulates mechanosensitive actin nucleation by formins. *Nat. Cell Biol.* 15:395–405.
65. Thiam, H. R., P. Vargas, ..., M. Piel. 2016. Perinuclear Arp2/3-driven actin polymerization enables nuclear deformation to facilitate cell migration through complex environments. *Nat. Commun.* 7:10997.
66. Head, B. P., H. H. Patel, and P. A. Insel. 2014. Interaction of membrane/lipid rafts with the cytoskeleton: impact on signaling and function: membrane/lipid rafts, mediators of cytoskeletal arrangement and cell signaling. *Biochim. Biophys. Acta.* 1838:532–545, Published online July 27, 2013.
67. Petersen, E. N., H. W. Chung, ..., S. B. Hansen. 2016. Kinetic disruption of lipid rafts is a mechanosensor for phospholipase D. *Nat. Commun.* 7:13873.
68. Haining, A. W., T. J. Lieberthal, and A. Del Río Hernández. 2016. Talin: a mechanosensitive molecule in health and disease. *FASEB J.* 30:2073–2085.

**Biophysical Journal, Volume 117**

**Supplemental Information**

**Mechanical Point Loading Induces Cortex Stiffening and Actin  
Reorganization**

**Jinrong Hu, Shenbao Chen, Wenhui Hu, Shouqin Lü, and Mian Long**

# **Mechanical point loading induces cortex stiffening and actin reorganization**

Jinrong Hu<sup>1,2</sup>, Shenbao Chen<sup>1,2</sup>, Wenhui Hu<sup>1,3</sup>, Shouqin Lü<sup>1,2†</sup>, and Mian Long<sup>1,2†</sup>

<sup>1</sup>Center of Biomechanics and Bioengineering, Key Laboratory of Microgravity (National Microgravity Laboratory), Beijing Key Laboratory of Engineered Construction and Mechanobiology, and CAS Center for Excellence in Complex System Mechanics, Institute of Mechanics, Chinese Academy of Sciences, Beijing, China.

<sup>2</sup>School of Engineering Science, University of Chinese Academy of Sciences, Beijing, China.

<sup>3</sup>Immune Cells and Antibody Engineering Research Center, Guizhou Province/Key Laboratory of Biology and Medical Engineering, Guizhou Medical University, Guiyang, China.

## **Supplementary Figures and Figure Captions**



Figure S1

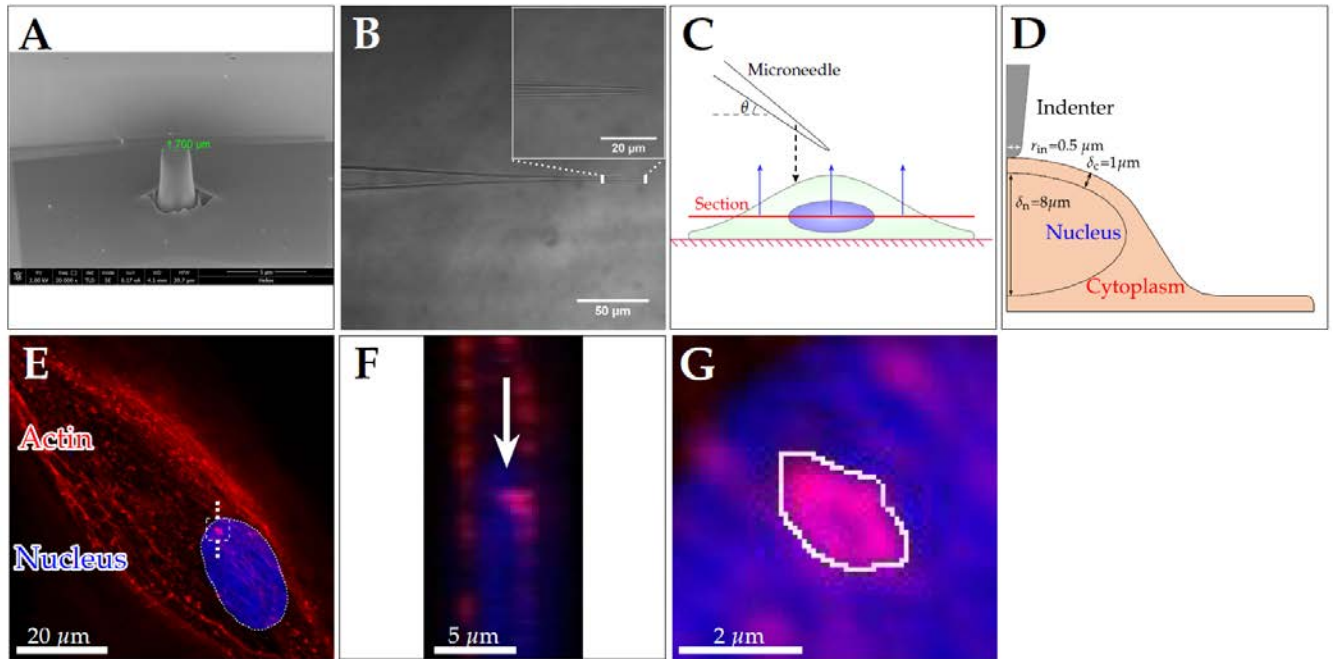

**Figure S1. Schematics of point loading approach to the cell from the top of the nucleus, the geometry model for simulations and data collection of local actin fluorescence intensity in a cell.** (A) Typical SEM image presented the truncated cylinder CSG-10 probe with a height of 3-4  $\mu\text{m}$  and a tip diameter of 1.5-2  $\mu\text{m}$ , which was used to point load the cell with assigned force using AFM assay. (B) Borosilicate glass microneedle was used to point load the cell. Zoomed in the insert showed the tip of needle with a radius around 1.5  $\mu\text{m}$ . (C) Protocols of collecting the fluorescent information and point loading the cell using either microneedle or AFM tip (only shown with microneedle for clarity). Here the cell was segregated into upper and lower regions (segmented at the middle plane of the nucleus in the cross section) and only fluorescence in the upper region (one above the red line) was collected to exclude the potential interference originating from the basal fluorescence of stress fibers in the lower region. Microneedle loading path was depicted using black dashed downward arrow (indentation depth 3-5  $\mu\text{m}$ ).  $\theta \approx 45^\circ$  for the needle or  $90^\circ$  for AFM tip. (D) Schematic of the geometry model for simulations.  $r_{\text{in}}$  denoted the radius of AFM tip,  $\delta_{\text{c}}$  the thickness of cytoplasm (or cortex) above the nucleus, and  $\delta_{\text{n}}$  the dimension of the nucleus. (E-G) When loading the cell using AFM probe depicted in (A), local actin intensity enhancement in a typical HF cell could be evidently visible at the loading site (red spot inside the white dashed box in (E)), as magnified in (F) using the white arrow and further magnified in (G) with white ring encircled. Local actin intensity enhancement was also visualized from side view along the white dotted line (dotted line within the dashed box was omitted for clarity) in (E), as magnified in (F). The extent of the local actin intensity enhancement was assessed using the ratio of mean fluorescence intensity in the white ring  $I_{\text{ROI}}$  (G) to average fluorescence intensity above the nucleus  $I_{\text{N}}$  (to exclude the potential interference from peripheral, strong stress fibers), that is,  $I_{\text{Relative}} = I_{\text{ROI}}/I_{\text{N}}$ .

Figure S2

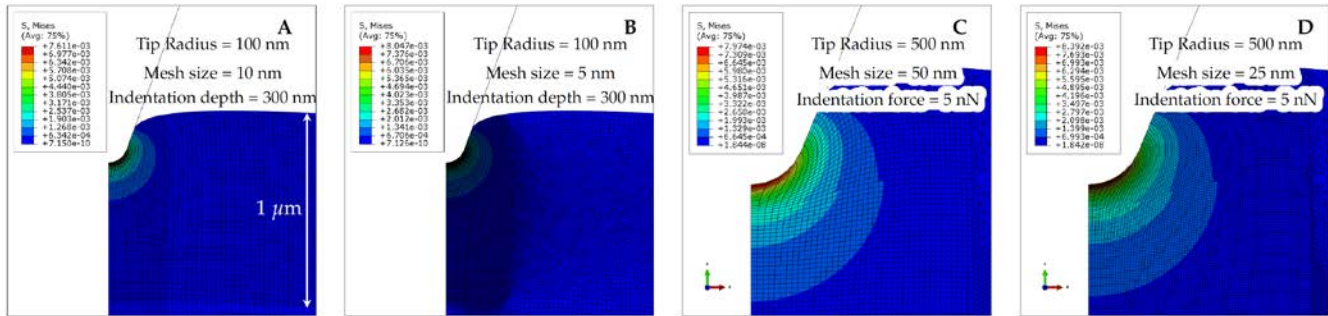

**Figure S2. Computational modeling of indentation test using sharp tips with 100/500-nm radii.** von Mises stress distributions were presented with mesh size of 10 nm (A) and 5 nm (B) upon 0.2 nN loading/300-nm indentation and with mesh size of 50 nm (C) and 25 nm (D) upon 5 nN loading. The converged results can only be obtained in loading of 0.2 nN/300-nm for 100-nm tip radius, which yields far smaller force value than the applied force of 5 nN. That is why the tip radius 500 nm was chosen for the simulations of the sharp-ended probe.

Figure S3

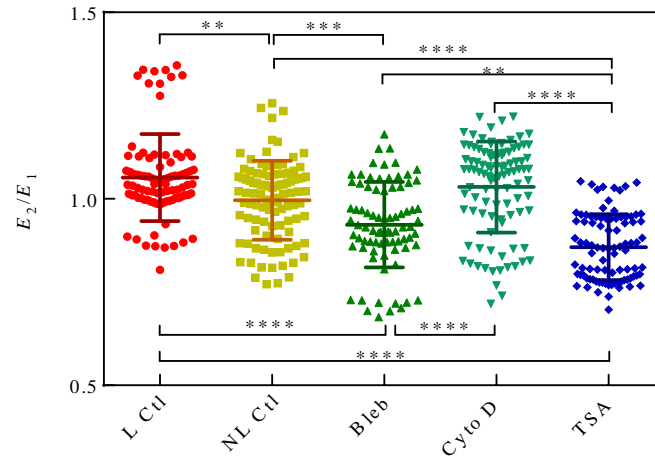

**Figure S3. Statistics of  $E_2/E_1$  ratios for all the groups.** Each ring has one  $E_2/E_1$  ratio and there are 10 data points for each cell and 9, 10, 8, 10 and 9 cells for *L Ctl*, *NL Ctl*, *Bleb-*, *Cyto D-* and *TSA*-treated groups, respectively. *L Ctl*, loading control; *NL Ctl*, non-loading control. \*\*,  $p < 0.01$ , \*\*\*,  $p < 0.001$ , \*\*\*\*,  $p < 0.0001$ .

Figure S4

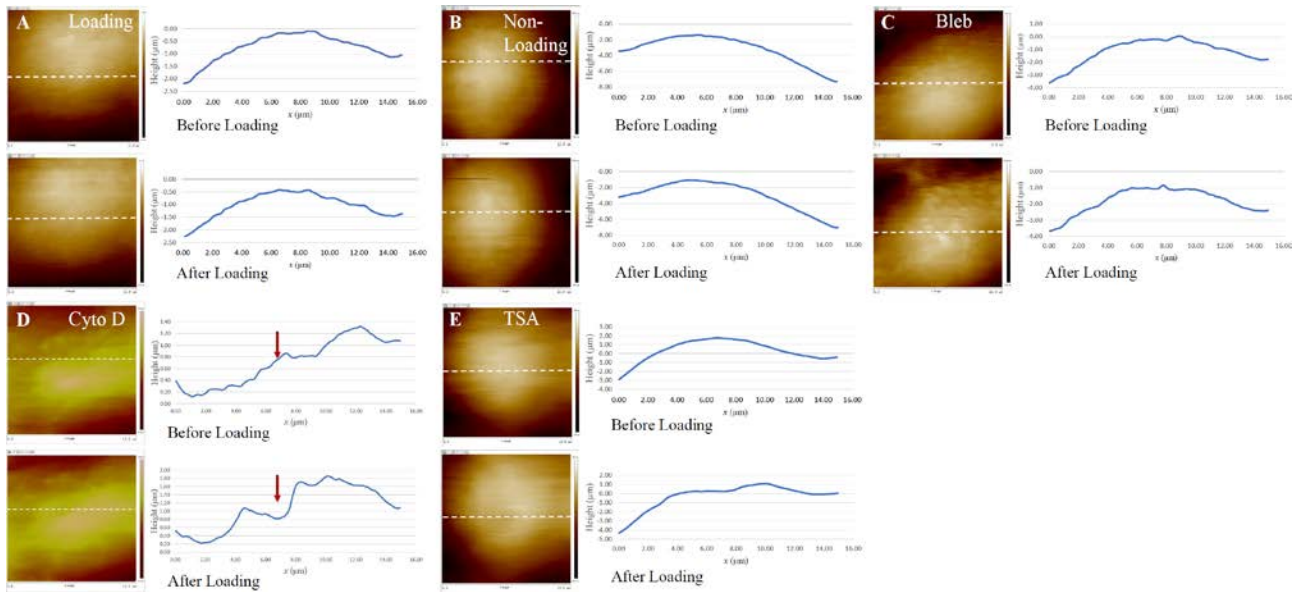

**Figure S4.** Representative height profiles across loading centers for *Loading* (A), *Non-Loading* (B), *Bleb-* (C), *Cyto D-* (D) and *TSA-treated* (E) groups. Both scanning image (*left*) and corresponding height profile (*right*) along the section crossing loading centers (*white dashed line*) were presented in each panel. The *red arrows* in panel (D) denoted the unrecoverable deformation of the cell upon Cyto D treatment.

Figure S5

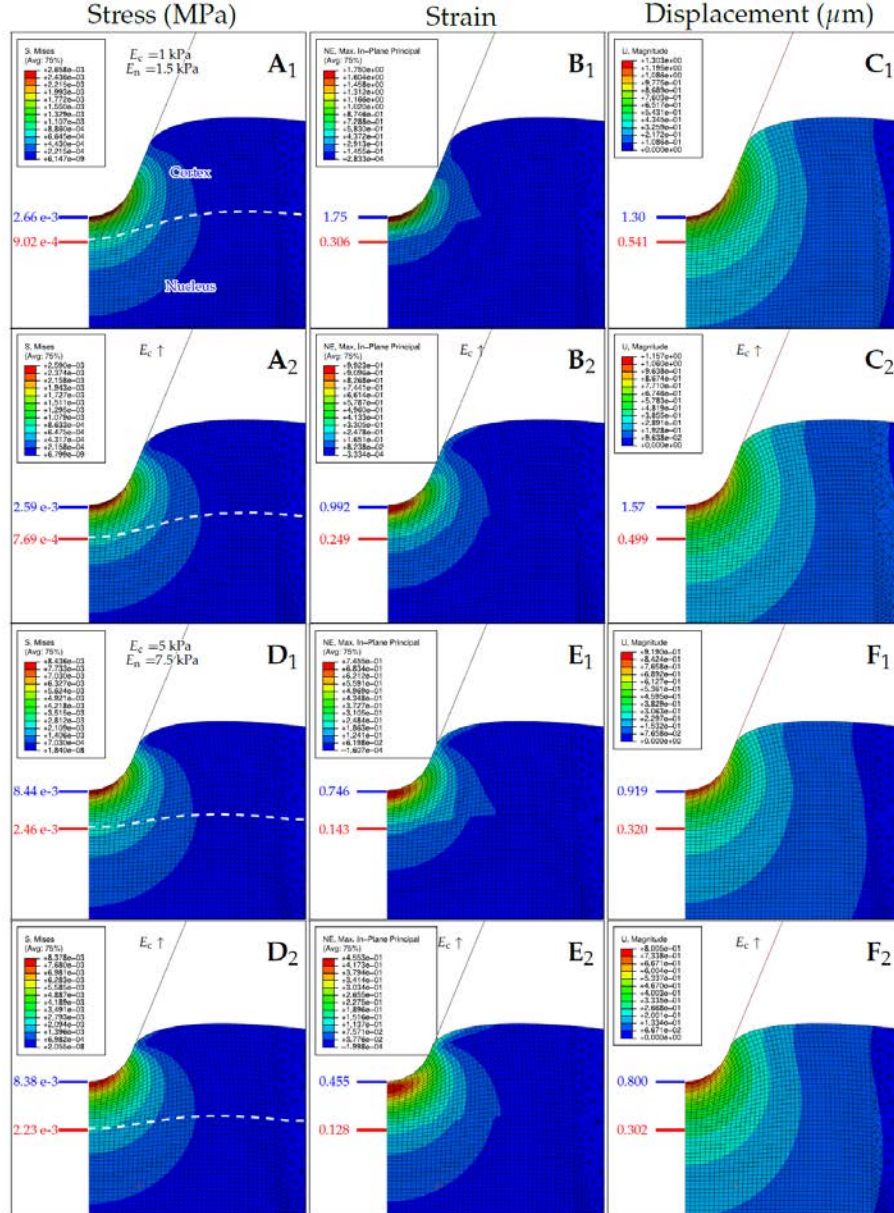

**Figure S5.** Parametric analyses of mechanical modeling. (A-F) Distribution of von Mises stress  $\sigma_{\text{von}}$ , maximum strain  $\epsilon$  and magnitude of deformation  $U$ . In (A<sub>1</sub>-C<sub>1</sub>),  $E_c = 1$  kPa and  $E_n = 1.5$  kPa (subscript 'c' denotes the cytoplasm and 'n' the nucleus) were used and corresponding results of cortex stiffening were shown in (A<sub>2</sub>-C<sub>2</sub>) with  $E_c' = 1.35 E_c$  ( $E_c \uparrow$ ) and  $E_n = 1.5$  kPa. In (D<sub>1</sub>-F<sub>1</sub>),  $E_c = 5$  kPa and  $E_n = 7.5$  kPa were used and corresponding results of cortex stiffening were shown in (D<sub>2</sub>-F<sub>2</sub>) with  $E_c' = 1.35 E_c$  ( $E_c \uparrow$ ) and  $E_n = 7.5$  kPa. Blue lines and values denoted the maximum  $\sigma_{\text{von}}$ ,  $\epsilon$  and  $U$  of cortex, and red lines and values were for the nucleus. From (A-C) (with  $E_c = 1$  kPa,  $E_n = 1.5$  kPa, and loading force of around 2 nN), the maximum  $\sigma_{\text{von}}$ ,  $\epsilon$  and  $U$  had 2.6%, 43.3% and 10.8% decrease for cell cortex, and 14.7%, 18.6% and 7.8% decrease for the nucleus, respectively. From (D-F) (with  $E_c = 5$  kPa and  $E_n = 7.5$  kPa, and loading force of 5 nN), the maximum  $\sigma_{\text{von}}$ ,  $\epsilon$  and  $U$  yielded 0.7%, 39% and 12.9% decrease for cell cortex, and 9.3%, 10.5% and 5.6% decrease for the nucleus, respectively (details in Table 1).

Figure S6

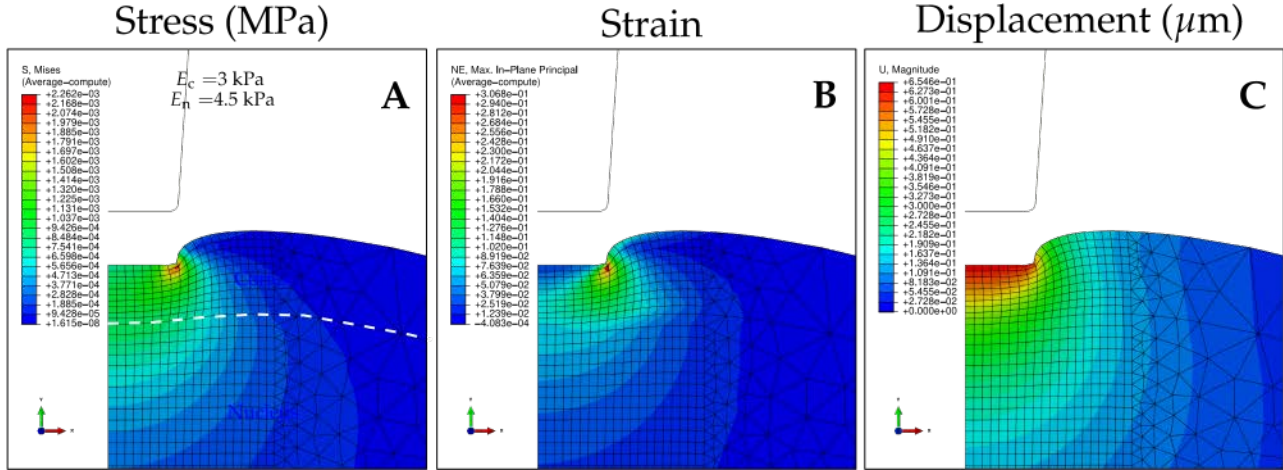

**Figure S6.** Stress, strain and deformation fields simulations upon flat-ended cylinder-like probe induced indentation (tip diameter was set to be  $1.7 \mu\text{m}$  as in Fig. S1 A). Stress field revealed that geometrical jump at the periphery of the tip (a ring when considering the model as axisymmetric) could incur large increase of stress (A) and strain (B) even though the change in displacement showed a different pattern (C). The loading force was  $5 \text{ nN}$ .

Figure S7

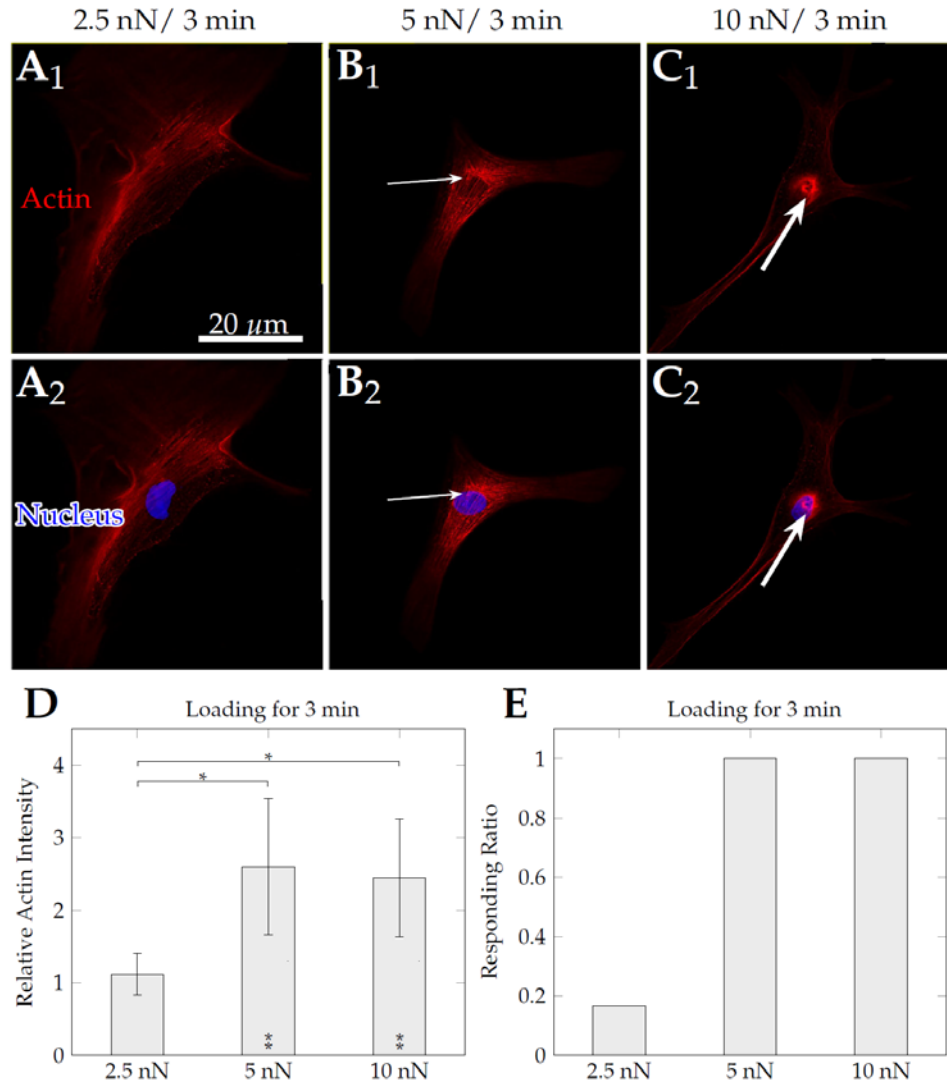

**Figure S7.** Loading force dependence of local actin intensity enhancement after point loading for HF cells upon AFM assay. (2.5, 5 and 10 nN) / 3 min were used to load HF cells ((A<sub>1</sub>-C<sub>1</sub>) for actin (red) alone and (A<sub>2</sub>-C<sub>2</sub>) with nucleus (blue) presented). White arrows indicated the loading sites and local actin intensity enhancement were captured in (5, 10) nN / 3 min but not in 2.5 nN / 3 min. Quantitative statistics of RFI and cellular responding ratio were shown in (D) and (E), respectively. Asterisks inside the bars showed significant difference of this bar to the baseline '1'. \*,  $p < 0.05$ , \*\*,  $p < 0.01$ .  $n = 5-6$ .

Figure S8

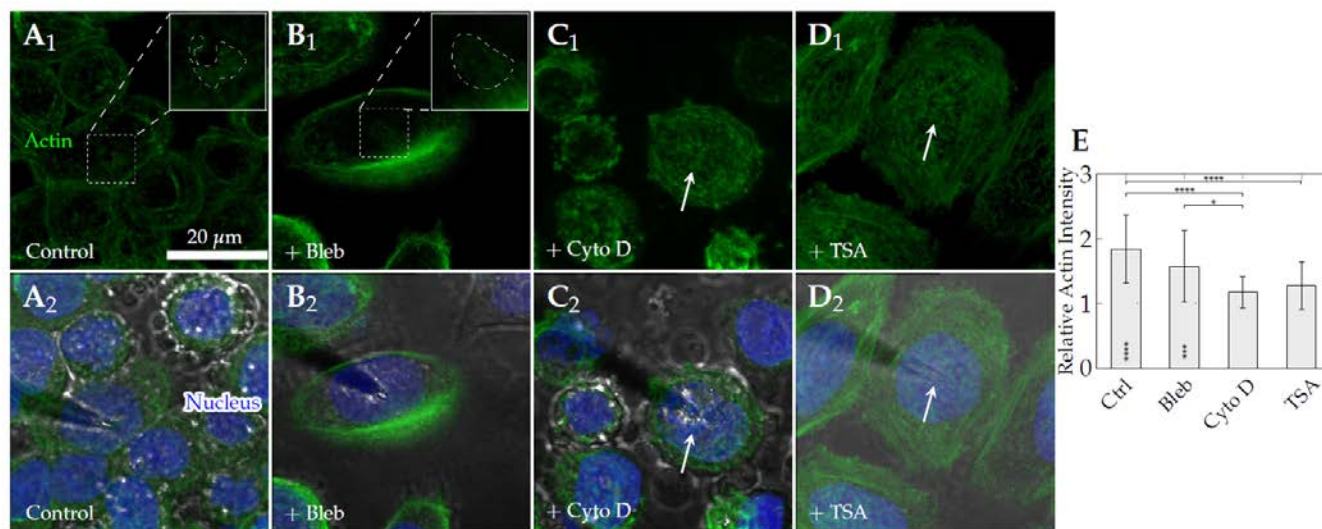

**Figure S8.** Alteration of local actin intensity enhancement by blocking the key molecules of myosin contraction, actin polymerization and histone deacetylase inhibiting induced chromatin decondensation using respective inhibitors for HeLa cells. Local actin intensity enhancement at the point loading site was captured with 3D reconstruction right after (<2 s) loading the cell using the microneedle (about 1 min for reconstruction). (A<sub>1</sub>-D<sub>1</sub>) depicted the cell responses without drug treatment or when treating the cell using 15 μM Bleb for 20 min, 15 μM Cyto D for 20 min, and 100 nM TSA for 24 h, respectively. Dashed square boxes in (A<sub>1</sub>-B<sub>1</sub>) depicted the region of local actin intensity enhancement as magnified in inserts (the region with local actin intensity enhancement was embraced by an irregular dashed contour, and the central hole of which indicated the site occupied by the needle). White arrows indicated the loading site in (C-D). Bright field and stained nucleus were shown in (A<sub>2</sub>-D<sub>2</sub>). (E) The RFI normalized to the background was calculated as the mean ± SD in each case and compared among distinct cases. Asterisks inside columns showed significant differences among groups to baseline '1'. \*,  $p < 0.05$ , \*\*\*,  $p < 0.001$ , \*\*\*\*,  $p < 0.0001$ .  $n = 20-31$  and from 2-3 repeats.



Figure S9

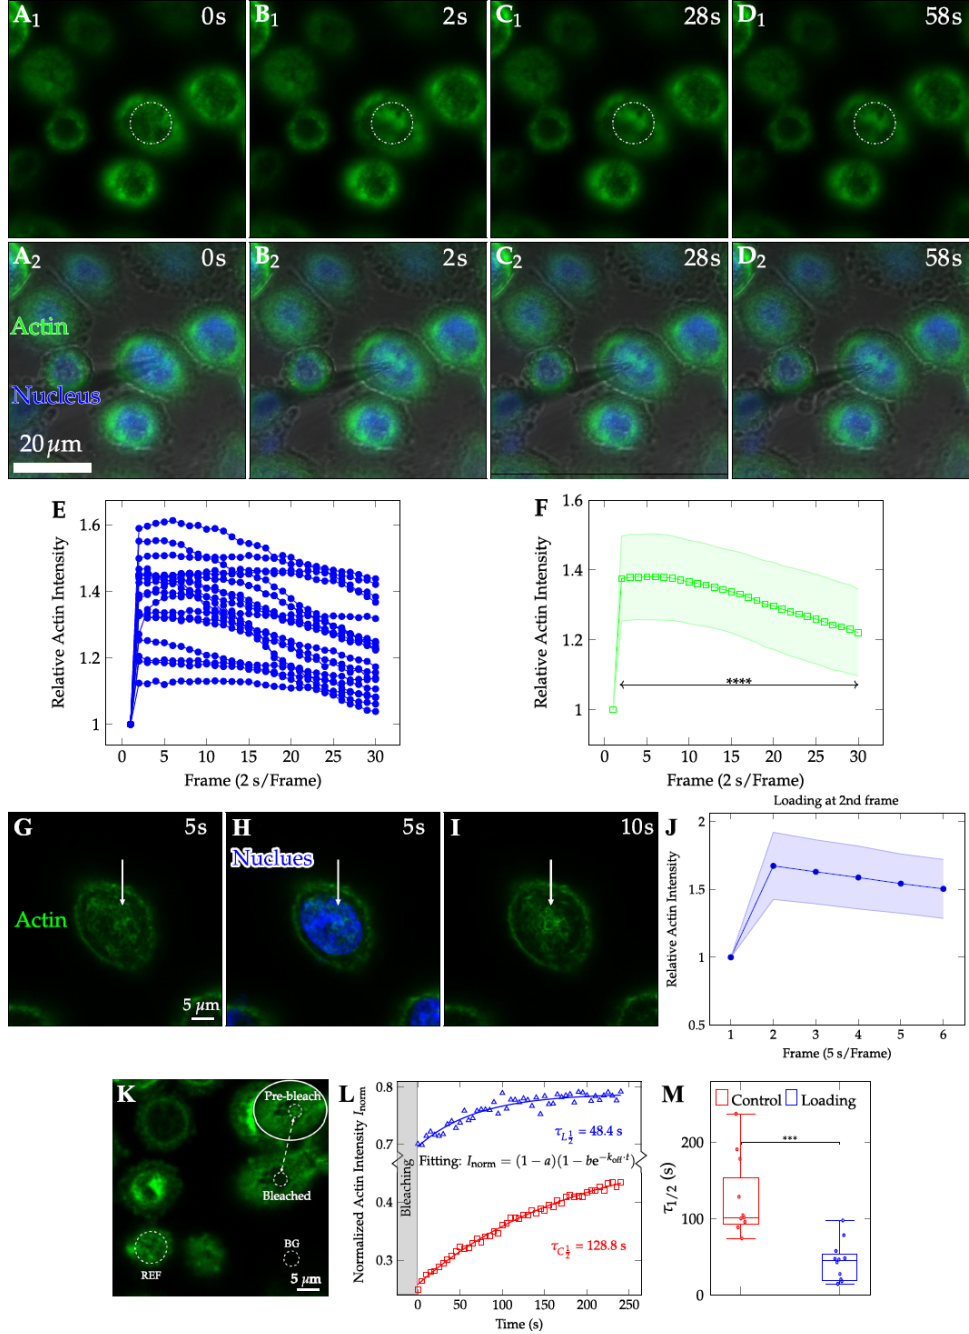

**Figure S9.** Loading dynamics of local actin (*green*) intensity enhancement at the point loading site of HeLa cell using microneedle assay. (A-D) denoted the serial images of actin (*green*) fluorescent intensity in 1 min without 3D reconstruction, the interval time is 2 s and 30 frames in total. The needle was in hover at the first frame (first 2 s) as in (A<sub>1</sub> and A<sub>2</sub>) and then loaded on the top of the nucleus (*blue*) at the second frame (4 s) as in (B<sub>1</sub> and B<sub>2</sub>). The loaded region was annotated as white dashed circles. (E-F) Time evolution of mean RFI that were quantified from (A-D) and normalized to the different value between the background and the first frame were shown for each cell (E) or accumulative mean  $\pm$  SD of all cells (F). Asterisks showed significant difference among 2nd-30th frame to the first one ( $n = 20$ ). (G-J) Confirmation of fast actin reorganization dynamics upon point loading. Actin reorganization dynamics was evaluated by a fast ‘3DR’+‘TS’ mode for

the upper half of the cell only. 3D reconstruction of a cell only took 5 s in this setting. The microneedle was in hovering at the first frame (*G* and *H*) and then loaded at the second frame (*I*). The time course of fluorescence intensity was quantified in (*J*). *White arrows* indicated the point loading site. (K-M) Actin recovery dynamics upon FRAP tests. The photobleached area was set as a circle with the diameter of 2.5  $\mu\text{m}$  (*K*). Typical data of actin recovery dynamics in the absence (*red*) and the presence of point loading (*blue*) were shown (*points*) with respective fitted curves (*lines*) (*L*). The fluorescence intensity of bleached areas was normalized by a reference area (*REF*) and a background (*BG*) area. Statistic data of the half-life estimated from fitted curves ( $\tau_{1/2} = \ln 2/k_{\text{off}}$ ) were shown in (*M*). <sup>\*\*\*</sup>,  $p < 0.001$ , <sup>\*\*\*\*</sup>,  $p < 0.0001$ .

**Figure S10**

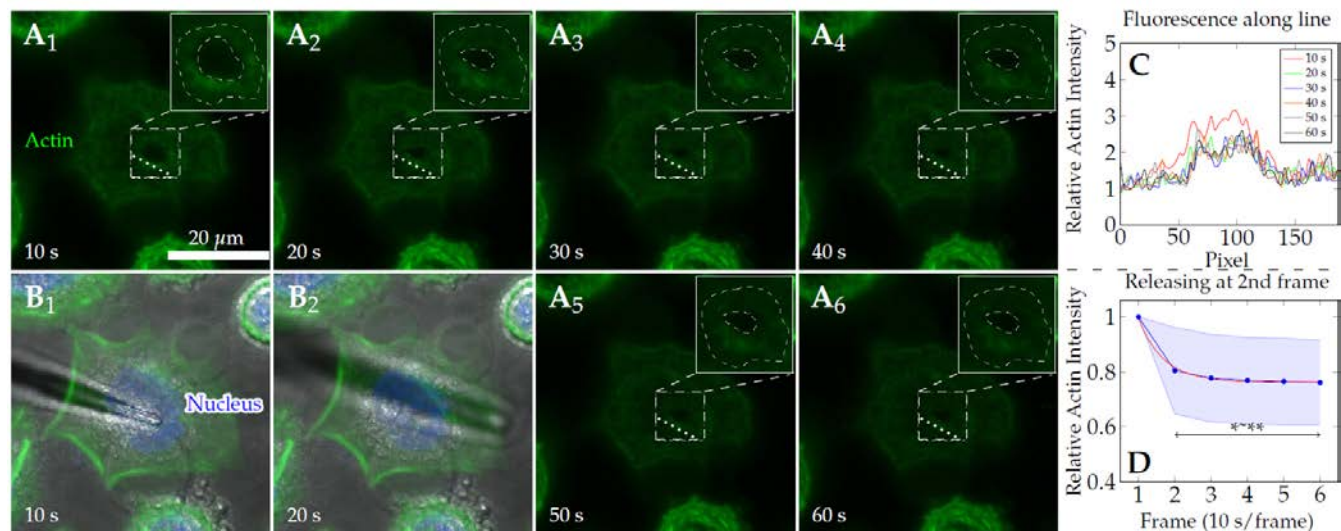

**Figure S10.** Recovery dynamics of local actin fluorescence intensity of HeLa cells after removing the microneedle from the loading site. ( $A_1$ - $A_6$ ) denoted the serial images of actin (green) fluorescent intensity in 1 min with 3D reconstruction every 10 s (thus 6 frames in total). The needle had been loading on the nucleus for 2 min 50 s before collecting fluorescence. After finishing the first frame, the needle was lifted apart and kept in hover as in ( $B_1$  and  $B_2$ ). Dashed square boxes in ( $A_1$ - $A_6$ ) depicted the region of local actin intensity enhancement as magnified in inserts (the region of local actin intensity enhancement was embraced by irregular dashed contour). (C) Spatiotemporal distribution of RFI along the white dotted line in dashed boxes in ( $A_1$ - $A_6$ ). (D) Evolution of mean RFI  $\pm$  SD (blue) in the entire dashed regions in inserts. The mean RFI data was then fitted using an empirical equation,  $I(t) = I_{\text{base}} + \exp(-t/\tau_0)$  (red line), in which  $I_{\text{base}}$  denotes the baseline fluorescence and  $\tau_0$  the characteristic time. Half-life time of RFI decay was obtained from curve fitting as  $\tau_{1/2} = t_1 + \tau_0 \ln 2 = 14.8$  s when  $t_1 = 10$  s. Asterisks showed significant difference among 2-6 frames to the first one. \*,  $p < 0.05$ , \*\*,  $p < 0.01$ .  $n = 10$ .

Figure S11

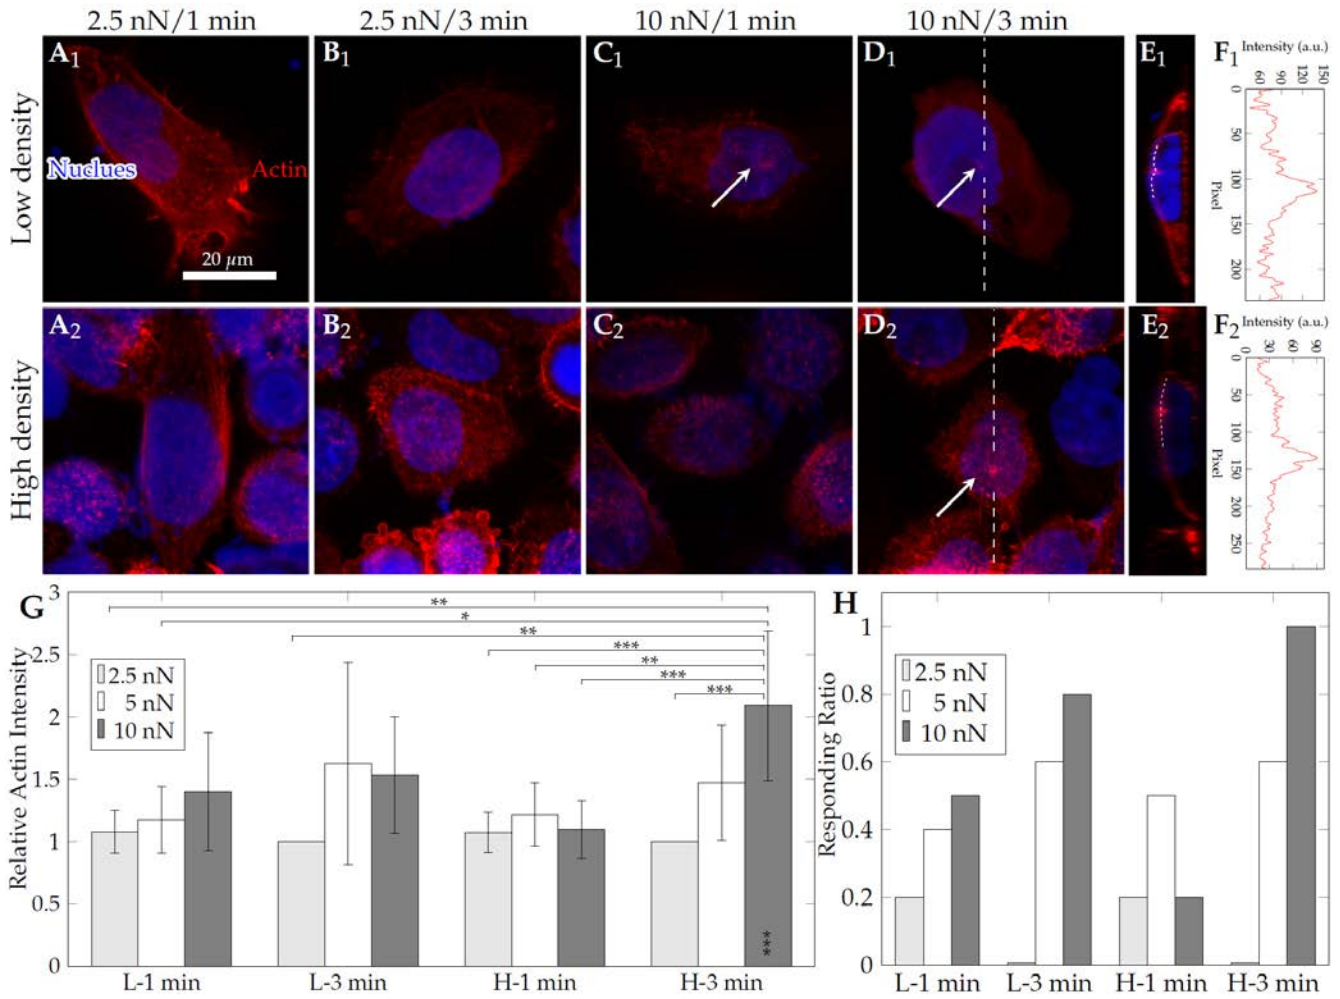

**Figure S11.** Cell density dependence of local actin intensity enhancement of HeLa cells upon AFM assay. Cells seeded in low density meant each cell was isolated without direct communication with other cells. Here force values of 2.5, 5 and 10 nN and loading duration of 1 min and 3 min were applied. (A<sub>1</sub>-D<sub>1</sub>) depicted the cell responses after loading in 2.5 nN/1 min, 5 nN/3 min, 10 nN/1 min and 10 nN/3 min for cells seeded in low density ('L-'). The counterparts for cells seeded in high density ('H-') were shown in (A<sub>2</sub>-D<sub>2</sub>). Images for 5 nN/(1, 3) min were not shown for clarity. Typical cross-sections for local actin intensity increase sites as labeled using white dashed line and white arrow in (C-D) were shown in (E) and corresponding fluorescence intensity along the dashed white dotted line in membrane were shown in (F). The actin intensity peak revealed local actin intensity enhancement at the point loading site. Quantified comparisons of RFI and responding ratio between low and high density seeded cells were shown in (G and H), respectively. Asterisks inside the last bar of (G) showed significant difference of this bar to baseline '1'. \*,  $p < 0.05$ , \*\*,  $p < 0.01$ , \*\*\*,  $p < 0.001$ .  $n = 5-6$  for each condition.

Figure S12

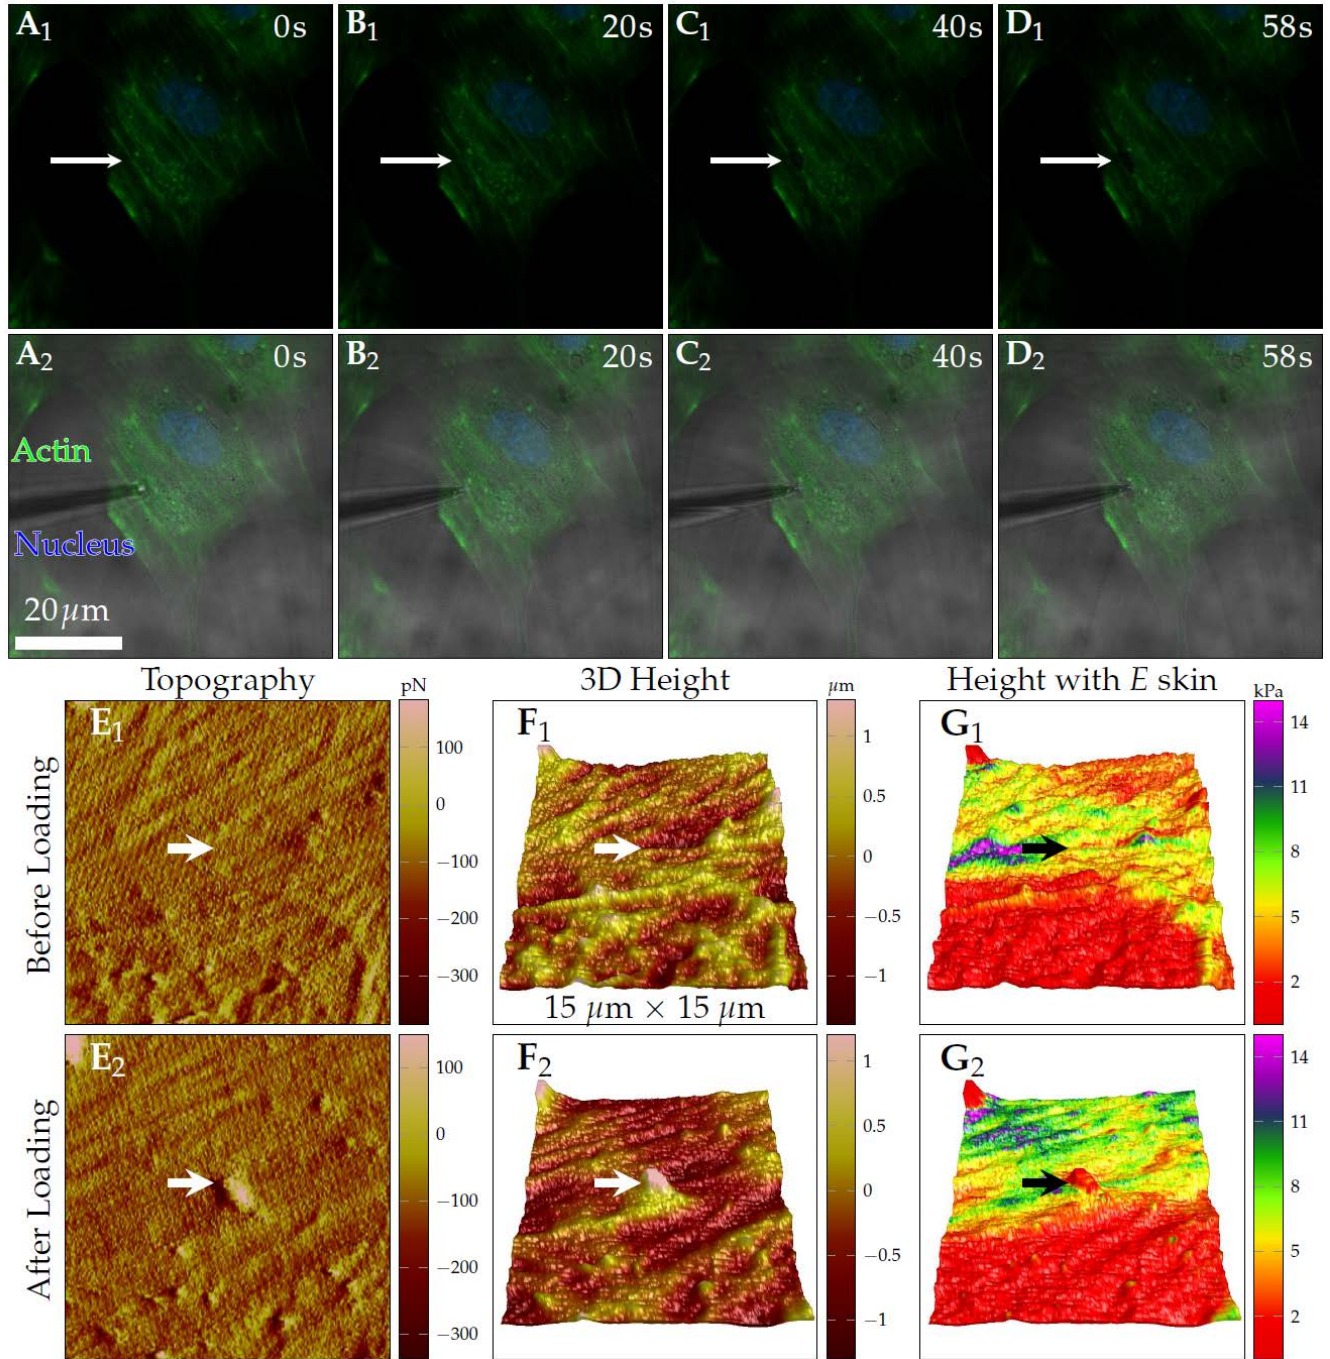

**Figure S12.** Stress fibers were disrupted when point loading at the cell periphery of HUVEC. (A-D) Disruption of stress fiber when loading at cell periphery using microneedle. After loading for about 20 s (B), pronounced disruption of stress fiber was captured. (E-G) When loading cell periphery using AFM at 5 nN / 3 min, disruption of stress fiber could be captured occasionally as in (E and F) with *white* arrows labelled. The sharp decrease of stiffness at the loading point (indicated as the *black* arrow in (G) also captured the disruption of stress fiber. (E<sub>1</sub>-G<sub>1</sub>) Scanning for the first time and (E<sub>2</sub>-G<sub>2</sub>) scanning for the second time, a similar protocol in Figs. 1 and 2.

Figure S13

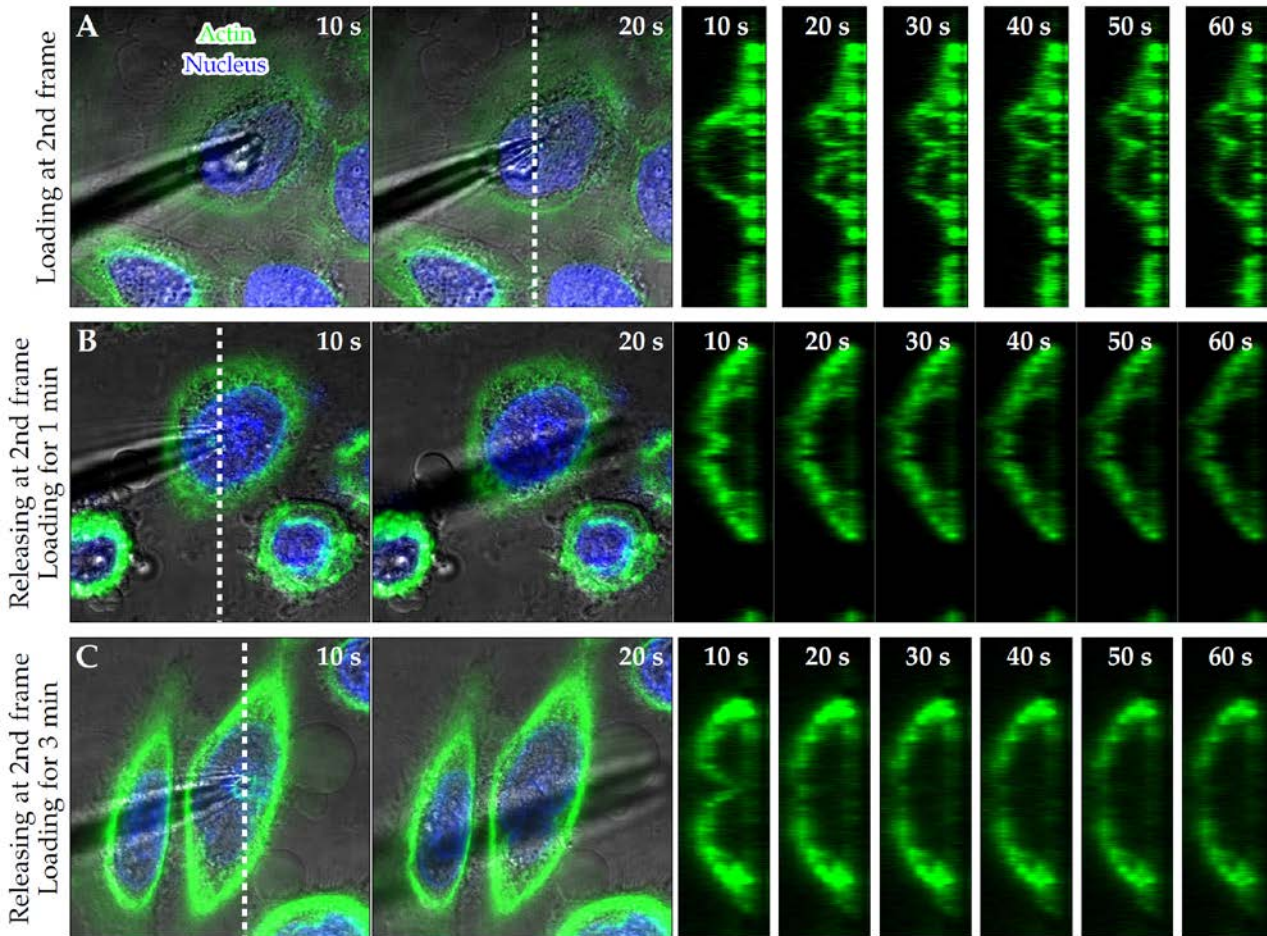

**Figure S13.** Cellular viscous effect under microneedle loading. Recovery dynamics of cellular deformation in the processes of loading (A), and unloading after 1- (B) or 3-min (C) loading.
